# Supplementary material for: Secondary structure changes as the potential H2 sensing mechanism of group D [FeFe]-hydrogenases
Source: Royal Society of Chemistry journal article supplement (doi:10.1039/d4cc03098b), 2024-01-01
Supplement: d4cc03098b1.xlsx [file d4cc03098b1.xlsx]

## Sheet: Fig.3 and4
Wavenumber in cm-1	TamHydS photoreduction	Wavenumber / cm-1	CrHydA1 photoreduction	Wavenumber in cm-1	TamHydS H2 induced
1600.61	0.000184601	3999.04	-5.41556e-05	1600.61	-0.000672451
1601.25	0.00015381	3998.07	-9.96716e-05	1601.25	-0.000594761
1601.9	0.000121016	3997.11	-0.0001333	1601.9	-0.000546882
1602.54	8.25164e-05	3996.14	-0.000135952	1602.54	-0.000516203
1603.18	4.4508e-05	3995.18	-0.000127933	1603.18	-0.000480785
1603.82	1.78411e-05	3994.21	-0.00012434	1603.82	-0.000429865
1604.47	5.44289e-06	3993.25	-0.00011104	1604.47	-0.000373303
1605.11	-2.68924e-06	3992.29	-7.67534e-05	1605.11	-0.000327634
1605.75	-1.77458e-05	3991.32	-3.17043e-05	1605.75	-0.000297922
1606.4	-3.98266e-05	3990.36	-2.46606e-05	1606.4	-0.000272658
1607.04	-6.04444e-05	3989.39	-6.23842e-05	1607.04	-0.000238724
1607.68	-7.39693e-05	3988.43	-7.74541e-05	1607.68	-0.000195639
1608.32	-8.19196e-05	3987.46	-5.71749e-05	1608.32	-0.000155827
1608.97	-8.9029e-05	3986.5	-5.06325e-05	1608.97	-0.00013031
1609.61	-9.78219e-05	3985.54	-6.69199e-05	1609.61	-0.00011828
1610.25	-0.000108673	3984.57	-9.03052e-05	1610.25	-0.000111238
1610.89	-0.000120107	3983.61	-0.000107163	1610.89	-0.000103518
1611.54	-0.000128022	3982.64	-9.21017e-05	1611.54	-9.68438e-05
1612.18	-0.000129623	3981.68	-5.39503e-05	1612.18	-9.07948e-05
1612.82	-0.000124794	3980.71	-2.93618e-05	1612.82	-7.32668e-05
1613.47	-0.000115386	3979.75	-3.26665e-05	1613.47	-2.82818e-05
1614.11	-0.000102528	3978.78	-5.75178e-05	1614.11	4.22571e-05
1614.75	-9.12221e-05	3977.82	-7.47337e-05	1614.75	0.000106644
1615.39	-8.58705e-05	3976.86	-6.56602e-05	1615.39	0.000128643
1616.04	-8.23501e-05	3975.89	-6.04079e-05	1616.04	0.000100511
1616.68	-6.72956e-05	3974.93	-7.27113e-05	1616.68	4.53166e-05
1617.32	-3.38363e-05	3973.96	-6.28953e-05	1617.32	-1.07682e-05
1617.97	8.15242e-06	3973	-2.75701e-05	1617.97	-5.23621e-05
1618.61	4.12277e-05	3972.03	-2.54242e-05	1618.61	-6.64672e-05
1619.25	5.80822e-05	3971.07	-6.86993e-05	1619.25	-3.81787e-05
1619.89	6.58352e-05	3970.11	-0.000105442	1619.89	3.36995e-05
1620.54	7.46479e-05	3969.14	-0.0001139	1620.54	0.000124554
1621.18	8.55052e-05	3968.18	-0.000111687	1621.18	0.000201607
1621.82	9.30159e-05	3967.21	-0.000107803	1621.82	0.000253238
1622.47	9.53677e-05	3966.25	-0.000104457	1622.47	0.000291492
1623.11	9.77238e-05	3965.28	-9.41058e-05	1623.11	0.000322214
1623.75	0.000103104	3964.32	-6.63113e-05	1623.75	0.000331518
1624.39	0.000105708	3963.36	-4.36077e-05	1624.39	0.00030886
1625.04	9.81283e-05	3962.39	-5.25002e-05	1625.04	0.000278143
1625.68	8.21389e-05	3961.43	-8.07444e-05	1625.68	0.000282645
1626.32	6.55946e-05	3960.46	-0.000103688	1626.32	0.000340847
1626.97	5.24778e-05	3959.5	-0.000108363	1626.97	0.000433618
1627.61	4.22426e-05	3958.53	-0.000100545	1627.61	0.000529731
1628.25	3.51793e-05	3957.57	-0.000104468	1628.25	0.000614465
1628.89	3.43214e-05	3956.61	-0.000110659	1628.89	0.00069599
1629.54	3.76377e-05	3955.64	-9.58113e-05	1629.54	0.000787423
1630.18	3.93432e-05	3954.68	-8.44429e-05	1630.18	0.000876786
1630.82	3.77672e-05	3953.71	-8.90139e-05	1630.82	0.000919499
1631.46	3.881e-05	3952.75	-8.57502e-05	1631.46	0.00088761
1632.11	4.28897e-05	3951.78	-6.87121e-05	1632.11	0.000815336
1632.75	3.9041e-05	3950.82	-5.62839e-05	1632.75	0.000762821
1633.39	1.40947e-05	3949.86	-6.92577e-05	1633.39	0.000734658
1634.04	-2.87857e-05	3948.89	-9.88696e-05	1634.04	0.000685432
1634.68	-6.93887e-05	3947.93	-0.000111553	1634.68	0.000613239
1635.32	-8.70843e-05	3946.96	-0.000101521	1635.32	0.000587937
1635.96	-7.62619e-05	3946	-0.000100298	1635.96	0.000672892
1636.61	-4.54959e-05	3945.03	-0.000126256	1636.61	0.000837885
1637.25	-8.54511e-06	3944.07	-0.000154259	1637.25	0.000989341
1637.89	2.21436e-05	3943.11	-0.000159314	1637.89	0.00107
1638.54	4.00254e-05	3942.14	-0.000150144	1638.54	0.00111
1639.18	4.69603e-05	3941.18	-0.000135469	1639.18	0.00115
1639.82	5.07102e-05	3940.21	-0.000107278	1639.82	0.00119
1640.46	5.67727e-05	3939.25	-8.21633e-05	1640.46	0.00118
1641.11	6.26591e-05	3938.28	-8.78624e-05	1641.11	0.00113
1641.75	6.43914e-05	3937.32	-0.000106111	1641.75	0.00109
1642.39	6.55024e-05	3936.35	-9.79726e-05	1642.39	0.00111
1643.04	7.72741e-05	3935.39	-6.14797e-05	1643.04	0.00121
1643.68	0.000107234	3934.43	-3.3977e-05	1643.68	0.00137
1644.32	0.000152658	3933.46	-3.95965e-05	1644.32	0.00153
1644.96	0.0002054	3932.5	-5.75397e-05	1644.96	0.00166
1645.61	0.000265537	3931.53	-6.37689e-05	1645.61	0.00172
1646.25	0.000339169	3930.57	-5.22877e-05	1646.25	0.00175
1646.89	0.000427806	3929.6	-2.22137e-05	1646.89	0.00177
1647.54	0.000521395	3928.64	-4.6192e-06	1647.54	0.0018
1648.18	0.000604042	3927.68	-2.60354e-05	1648.18	0.0018
1648.82	0.000663968	3926.71	-4.91149e-05	1648.82	0.00172
1649.46	0.000693981	3925.75	-3.61615e-05	1649.46	0.00154
1650.11	0.000687964	3924.78	-1.09229e-05	1650.11	0.00128
1650.75	0.000640099	3923.82	-2.53113e-05	1650.75	0.000980159
1651.39	0.000552135	3922.85	-8.15549e-05	1651.39	0.00070128
1652.04	0.00044299	3921.89	-0.000122444	1652.04	0.000482484
1652.68	0.000344517	3920.93	-0.000144362	1652.68	0.000340759
1653.32	0.000281653	3919.96	-0.000181724	1653.32	0.000243744
1653.96	0.000252693	3919	-0.000194824	1653.96	0.000131358
1654.61	0.00023501	3918.03	-0.000147959	1654.61	-2.05931e-05
1655.25	0.000206277	3917.07	-0.000106116	1655.25	-0.000168418
1655.89	0.000161332	3916.1	-0.000125229	1655.89	-0.000252093
1656.53	0.000111703	3915.14	-0.00015889	1656.53	-0.000257071
1657.18	7.38046e-05	3914.18	-0.000155776	1657.18	-0.000221258
1657.82	5.65422e-05	3913.21	-0.000125407	1657.82	-0.00019156
1658.46	5.78538e-05	3912.25	-8.35964e-05	1658.46	-0.000190983
1659.11	7.11477e-05	3911.28	-4.90068e-05	1659.11	-0.000216663
1659.75	8.85205e-05	3910.32	-4.94582e-05	1659.75	-0.000255485
1660.39	9.86716e-05	3909.35	-7.02885e-05	1660.39	-0.000293915
1661.03	8.89296e-05	3908.39	-8.25555e-05	1661.03	-0.000324204
1661.68	5.31197e-05	3907.43	-8.95386e-05	1661.68	-0.00034444
1662.32	8.0287e-07	3906.46	-9.41099e-05	1662.32	-0.000361179
1662.96	-5.11882e-05	3905.5	-9.06691e-05	1662.96	-0.000387709
1663.61	-9.07298e-05	3904.53	-8.67747e-05	1663.61	-0.000434579
1664.25	-0.000114102	3903.57	-9.22883e-05	1664.25	-0.000501607
1664.89	-0.00012313	3902.6	-0.00010247	1664.89	-0.00058289
1665.53	-0.000124821	3901.64	-0.000100682	1665.53	-0.000675028
1666.18	-0.000131969	3900.68	-9.71054e-05	1666.18	-0.000779808
1666.82	-0.000158019	3899.71	-0.000111819	1666.82	-0.000901996
1667.46	-0.000207299	3898.75	-0.000129795	1667.46	-0.00105
1668.11	-0.000272098	3897.78	-0.000137228	1668.11	-0.00122
1668.75	-0.000339934	3896.82	-0.000131229	1668.75	-0.00141
1669.39	-0.000403453	3895.85	-0.000114863	1669.39	-0.0016
1670.03	-0.000462574	3894.89	-0.000109065	1670.03	-0.00178
1670.68	-0.000518166	3893.92	-0.000121472	1670.68	-0.00194
1671.32	-0.000564248	3892.96	-0.00013356	1671.32	-0.00205
1671.96	-0.000589651	3892	-0.000126994	1671.96	-0.00211
1672.61	-0.000588631	3891.03	-0.000109782	1672.61	-0.00214
1673.25	-0.000567306	3890.07	-9.90962e-05	1673.25	-0.00214
1673.89	-0.000536621	3889.1	-9.91622e-05	1673.89	-0.0021
1674.53	-0.000500906	3888.14	-0.000117443	1674.53	-0.00202
1675.18	-0.000458173	3887.17	-0.000140078	1675.18	-0.0019
1675.82	-0.000410069	3886.21	-0.000133967	1675.82	-0.00177
1676.46	-0.000364384	3885.25	-0.000104185	1676.46	-0.00168
1677.1	-0.000327473	3884.28	-8.96569e-05	1677.1	-0.00161
1677.75	-0.000298006	3883.32	-0.000109551	1677.75	-0.00156
1678.39	-0.000270657	3882.35	-0.000129779	1678.39	-0.00151
1679.03	-0.0002435	3881.39	-0.000116589	1679.03	-0.00146
1679.68	-0.000218185	3880.42	-0.000105852	1679.68	-0.00141
1680.32	-0.000198627	3879.46	-0.000127933	1680.32	-0.00138
1680.96	-0.000187846	3878.5	-0.000129308	1680.96	-0.00135
1681.6	-0.000186837	3877.53	-9.22389e-05	1681.6	-0.00133
1682.25	-0.000195701	3876.57	-8.94412e-05	1682.25	-0.00132
1682.89	-0.000213825	3875.6	-0.000126275	1682.89	-0.00133
1683.53	-0.000236035	3874.64	-0.000139513	1683.53	-0.00136
1684.18	-0.000249738	3873.67	-0.000135305	1684.18	-0.00141
1684.82	-0.000243054	3872.71	-0.000150115	1684.82	-0.00145
1685.46	-0.00022005	3871.75	-0.000169004	1685.46	-0.00149
1686.1	-0.000197519	3870.78	-0.000161514	1686.1	-0.00151
1686.75	-0.000186768	3869.82	-0.000118347	1686.75	-0.00154
1687.39	-0.00018373	3868.85	-6.02662e-05	1687.39	-0.00158
1688.03	-0.000179448	3867.89	-3.55136e-05	1688.03	-0.00162
1688.68	-0.000172804	3866.92	-6.55944e-05	1688.68	-0.00164
1689.32	-0.000167479	3865.96	-0.000118643	1689.32	-0.00162
1689.96	-0.000163787	3865	-0.000137809	1689.96	-0.00157
1690.6	-0.000159507	3864.03	-0.00010622	1690.6	-0.00149
1691.25	-0.000154029	3863.07	-8.54903e-05	1691.25	-0.00142
1691.89	-0.000147431	3862.1	-0.000103776	1691.89	-0.00135
1692.53	-0.000137939	3861.14	-0.000108306	1692.53	-0.0013
1693.18	-0.000126435	3860.17	-9.37892e-05	1693.18	-0.00126
1693.82	-0.000119344	3859.21	-0.000106616	1693.82	-0.00123
1694.46	-0.00012306	3858.25	-0.000128326	1694.46	-0.00119
1695.1	-0.000132596	3857.28	-0.00010779	1695.1	-0.00114
1695.75	-0.000131816	3856.32	-6.86822e-05	1695.75	-0.00108
1696.39	-0.0001098	3855.35	-4.65494e-05	1696.39	-0.00102
1697.03	-7.40791e-05	3854.39	-3.67321e-05	1697.03	-0.000949676
1697.67	-4.54431e-05	3853.42	-4.18739e-05	1697.67	-0.000891803
1698.32	-3.85445e-05	3852.46	-4.90154e-05	1698.32	-0.000846644
1698.96	-4.98565e-05	3851.49	-4.98802e-05	1698.96	-0.000812296
1699.6	-6.17562e-05	3850.53	-7.86418e-05	1699.6	-0.000781733
1700.25	-5.7187e-05	3849.57	-0.000130822	1700.25	-0.000746944
1700.89	-3.2921e-05	3848.6	-0.000148894	1700.89	-0.000703725
1701.53	-4.23106e-07	3847.64	-0.000123198	1701.53	-0.000653825
1702.17	2.58016e-05	3846.67	-0.000100928	1702.17	-0.000601294
1702.82	3.93837e-05	3845.71	-0.000105187	1702.82	-0.000549195
1703.46	4.30732e-05	3844.74	-0.000131152	1703.46	-0.000500034
1704.1	4.24509e-05	3843.78	-0.000164032	1704.1	-0.000456905
1704.75	4.16073e-05	3842.82	-0.000179487	1704.75	-0.000421331
1705.39	4.30528e-05	3841.85	-0.000168601	1705.39	-0.000390587
1706.03	4.72714e-05	3840.89	-0.000142501	1706.03	-0.000359304
1706.67	5.36438e-05	3839.92	-0.000123335	1706.67	-0.000324795
1707.32	6.21763e-05	3838.96	-0.000122758	1707.32	-0.000289066
1707.96	7.22494e-05	3837.99	-0.000130041	1707.96	-0.000255695
1708.6	8.11269e-05	3837.03	-0.000138804	1708.6	-0.000226359
1709.25	8.59833e-05	3836.07	-0.000153786	1709.25	-0.000201563
1709.89	8.76881e-05	3835.1	-0.000162981	1709.89	-0.00018043
1710.53	8.9316e-05	3834.14	-0.000154043	1710.53	-0.000158778
1711.17	9.11996e-05	3833.17	-0.000140681	1711.17	-0.000130873
1711.82	9.11083e-05	3832.21	-0.000138739	1711.82	-9.64466e-05
1712.46	8.80331e-05	3831.24	-0.000144741	1712.46	-6.34965e-05
1713.1	8.48092e-05	3830.28	-0.000139843	1713.1	-4.08799e-05
1713.75	8.42716e-05	3829.32	-0.000116903	1713.75	-2.67497e-05
1714.39	8.48444e-05	3828.35	-0.000103798	1714.39	-1.15336e-05
1715.03	8.08983e-05	3827.39	-0.000126582	1715.03	1.07128e-05
1715.67	6.80255e-05	3826.42	-0.00016451	1715.67	3.49047e-05
1716.32	4.88814e-05	3825.46	-0.000174022	1716.32	5.11348e-05
1716.96	3.21707e-05	3824.49	-0.000153582	1716.96	5.69691e-05
1717.6	2.50486e-05	3823.53	-0.000133301	1717.6	5.94845e-05
1718.24	2.76065e-05	3822.57	-0.000124499	1718.24	6.75485e-05
1718.89	3.48694e-05	3821.6	-0.000132622	1718.89	8.20357e-05
1719.53	4.2786e-05	3820.64	-0.000157225	1719.53	9.61176e-05
1720.17	5.01359e-05	3819.67	-0.000176957	1720.17	0.000105158
1720.82	5.59966e-05	3818.71	-0.000180155	1720.82	0.000110486
1721.46	5.80744e-05	3817.74	-0.000176481	1721.46	0.000116407
1722.1	5.49695e-05	3816.78	-0.000164493	1722.1	0.000124079
1722.74	4.87391e-05	3815.82	-0.000145943	1722.74	0.000131011
1723.39	4.32283e-05	3814.85	-0.000141641	1723.39	0.000135039
1724.03	3.9838e-05	3813.89	-0.000156701	1724.03	0.000136387
1724.67	3.67207e-05	3812.92	-0.000181815	1724.67	0.000136127
1725.32	3.29825e-05	3811.96	-0.000202307	1725.32	0.000135267
1725.96	2.97556e-05	3810.99	-0.000191127	1725.96	0.000135066
1726.6	2.83509e-05	3810.03	-0.000146047	1726.6	0.000138172
1727.24	2.63839e-05	3809.06	-0.000102741	1727.24	0.000146658
1727.89	2.09927e-05	3808.1	-9.26459e-05	1727.89	0.000160733
1728.53	1.29516e-05	3807.14	-0.000100917	1728.53	0.000176589
1729.17	6.3721e-06	3806.17	-9.62588e-05	1729.17	0.000187536
1729.82	4.35269e-06	3805.21	-8.87741e-05	1729.82	0.000189512
1730.46	5.31252e-06	3804.24	-9.91759e-05	1730.46	0.000183463
1731.1	2.9619e-06	3803.28	-0.000116995	1731.1	0.000175045
1731.74	-9.16781e-06	3802.31	-0.00012773	1731.74	0.000167907
1732.39	-3.22704e-05	3801.35	-0.000135748	1732.39	0.000161212
1733.03	-5.9672e-05	3800.39	-0.000143404	1733.03	0.000154657
1733.67	-7.91555e-05	3799.42	-0.000131935	1733.67	0.000151441
1734.32	-8.1514e-05	3798.46	-9.84456e-05	1734.32	0.000155415
1734.96	-6.77632e-05	3797.49	-8.08915e-05	1734.96	0.000165263
1735.6	-4.87234e-05	3796.53	-9.18808e-05	1735.6	0.000176112
1736.24	-3.53942e-05	3795.56	-9.93304e-05	1736.24	0.000184636
1736.89	-3.15927e-05	3794.6	-0.000111357	1736.89	0.000189813
1737.53	-3.4401e-05	3793.64	-0.000138376	1737.53	0.000190903
1738.17	-4.00667e-05	3792.67	-0.000131455	1738.17	0.000187556
1738.82	-4.6417e-05	3791.71	-9.24466e-05	1738.82	0.000182625
1739.46	-5.22925e-05	3790.74	-7.63312e-05	1739.46	0.000180203
1740.1	-5.68619e-05	3789.78	-8.64465e-05	1740.1	0.00018208
1740.74	-5.94128e-05	3788.81	-9.71498e-05	1740.74	0.00018493
1741.39	-5.9114e-05	3787.85	-9.14308e-05	1741.39	0.000183843
1742.03	-5.60581e-05	3786.89	-7.49474e-05	1742.03	0.000176012
1742.67	-5.14555e-05	3785.92	-8.0554e-05	1742.67	0.000162558
1743.31	-4.64123e-05	3784.96	-0.00011597	1743.31	0.000147331
1743.96	-4.17216e-05	3783.99	-0.000138831	1743.96	0.000134856
1744.6	-3.77297e-05	3783.03	-0.00012458	1744.6	0.000129979
1745.24	-3.54236e-05	3782.06	-0.000100397	1745.24	0.000134766
1745.89	-3.51647e-05	3781.1	-9.3609e-05	1745.89	0.000145892
1746.53	-3.6599e-05	3780.14	-0.000109607	1746.53	0.00015467
1747.17	-3.82402e-05	3779.17	-0.000128304	1747.17	0.000152906
1747.81	-3.83336e-05	3778.21	-0.000140058	1747.81	0.000140714
1748.46	-3.67341e-05	3777.24	-0.00016654	1748.46	0.000125495
1749.1	-3.61875e-05	3776.28	-0.000191352	1749.1	0.000114413
1749.74	-4.06315e-05	3775.31	-0.000179805	1749.74	0.00010986
1750.39	-4.97572e-05	3774.35	-0.000148945	1750.39	0.000111642
1751.03	-5.68928e-05	3773.39	-0.000135276	1751.03	0.00011871
1751.67	-5.60372e-05	3772.42	-0.000148099	1751.67	0.00012674
1752.31	-4.86399e-05	3771.46	-0.000166619	1752.31	0.000128977
1752.96	-4.19319e-05	3770.49	-0.000172036	1752.96	0.000121232
1753.6	-4.07454e-05	3769.53	-0.000159781	1753.6	0.000105312
1754.24	-4.49355e-05	3768.56	-0.000136527	1754.24	8.37619e-05
1754.89	-5.33588e-05	3767.6	-0.000117742	1754.89	5.35832e-05
1755.53	-6.63622e-05	3766.63	-0.000117065	1755.53	8.13432e-06
1756.17	-8.42033e-05	3765.67	-0.000139742	1756.17	-5.5732e-05
1756.81	-0.000104606	3764.71	-0.000155636	1756.81	-0.000132968
1757.46	-0.00012385	3763.74	-0.000135492	1757.46	-0.000212281
1758.1	-0.0001379	3762.78	-0.000108543	1758.1	-0.000279332
1758.74	-0.000143588	3761.81	-9.93714e-05	1758.74	-0.000319245
1759.39	-0.000138979	3760.85	-9.99511e-05	1759.39	-0.000320764
1760.03	-0.000124838	3759.88	-0.000114682	1760.03	-0.000281214
1760.67	-0.000103628	3758.92	-0.000135258	1760.67	-0.000207847
1761.31	-7.71709e-05	3757.96	-0.000136884	1761.31	-0.000114631
1761.96	-4.62904e-05	3756.99	-0.000121262	1761.96	-1.45589e-05
1762.6	-1.33748e-05	3756.03	-0.000105385	1762.6	8.29141e-05
1763.24	1.65799e-05	3755.06	-9.6583e-05	1763.24	0.00017349
1763.88	3.89056e-05	3754.1	-9.00534e-05	1763.88	0.000254702
1764.53	5.35982e-05	3753.13	-8.01144e-05	1764.53	0.000327126
1765.17	6.33807e-05	3752.17	-7.54876e-05	1765.17	0.000393272
1765.81	7.01862e-05	3751.21	-8.6061e-05	1765.81	0.000453801
1766.46	7.38319e-05	3750.24	-0.000104642	1766.46	0.000504413
1767.1	7.50142e-05	3749.28	-0.000116174	1767.1	0.000540146
1767.74	7.7082e-05	3748.31	-0.000117937	1767.74	0.000562038
1768.38	8.28179e-05	3747.35	-0.00011492	1768.38	0.000575806
1769.03	9.08471e-05	3746.38	-0.000114064	1769.03	0.000585293
1769.67	9.64422e-05	3745.42	-0.000125338	1769.67	0.000590847
1770.31	9.55462e-05	3744.46	-0.000131193	1770.31	0.000589967
1770.96	8.74403e-05	3743.49	-0.000119806	1770.96	0.000580671
1771.6	7.55926e-05	3742.53	-0.000111054	1771.6	0.000561588
1772.24	6.67199e-05	3741.56	-9.51913e-05	1772.24	0.000535245
1772.88	6.63619e-05	3740.6	-7.13841e-05	1772.88	0.000507728
1773.53	7.45299e-05	3739.63	-7.88222e-05	1773.53	0.000483718
1774.17	8.58112e-05	3738.67	-0.00010521	1774.17	0.000462641
1774.81	9.47188e-05	3737.71	-0.000121029	1774.81	0.000441792
1775.46	9.97293e-05	3736.74	-0.000136921	1775.46	0.000418944
1776.1	0.000101197	3735.78	-0.000148379	1776.1	0.000394553
1776.74	9.87013e-05	3734.81	-0.000135339	1776.74	0.000368692
1777.38	9.15088e-05	3733.85	-0.000102124	1777.38	0.000339448
1778.03	7.9959e-05	3732.88	-8.62419e-05	1778.03	0.000303557
1778.67	6.49875e-05	3731.92	-0.000103915	1778.67	0.000258412
1779.31	4.66509e-05	3730.96	-0.000122338	1779.31	0.000200638
1779.96	2.31877e-05	3729.99	-0.000131462	1779.96	0.000124216
1780.6	-8.60886e-06	3729.03	-0.000142088	1780.6	1.89229e-05
1781.24	-5.25414e-05	3728.06	-0.000139236	1781.24	-0.000126178
1781.88	-0.000111697	3727.1	-0.000112101	1781.88	-0.000320727
1782.53	-0.000187674	3726.13	-7.07492e-05	1782.53	-0.000573293
1783.17	-0.000280444	3725.17	-4.46396e-05	1783.17	-0.000889329
1783.81	-0.00038639	3724.2	-6.7197e-05	1783.81	-0.00126
1784.45	-0.000495932	3723.24	-0.000114988	1784.45	-0.00166
1785.1	-0.000594321	3722.28	-0.000137384	1785.1	-0.00203
1785.74	-0.00066645	3721.31	-0.000143237	1785.74	-0.00232
1786.38	-0.000701622	3720.35	-0.000168041	1786.38	-0.00248
1787.03	-0.000695444	3719.38	-0.000211491	1787.03	-0.00251
1787.67	-0.000649422	3718.42	-0.000225318	1787.67	-0.0024
1788.31	-0.000570891	3717.45	-0.000181977	1788.31	-0.00218
1788.95	-0.00047234	3716.49	-0.000137014	1788.95	-0.00189
1789.6	-0.000368807	3715.53	-0.000125607	1789.6	-0.00155
1790.24	-0.000273391	3714.56	-0.000121018	1790.24	-0.00122
1790.88	-0.000191518	3713.6	-0.000107664	1790.88	-0.000913831
1791.53	-0.00012036	3712.63	-9.33363e-05	1791.53	-0.000650528
1792.17	-5.48812e-05	3711.67	-9.47619e-05	1792.17	-0.000438339
1792.81	5.3335e-06	3710.7	-0.000105139	1792.81	-0.000279155
1793.45	5.54693e-05	3709.74	-0.000113028	1793.45	-0.000164887
1794.1	9.13523e-05	3708.78	-0.000146001	1794.1	-7.85374e-05
1794.74	0.000114381	3707.81	-0.000194782	1794.74	-1.77917e-06
1795.38	0.000129875	3706.85	-0.000202982	1795.38	7.87696e-05
1796.03	0.000142794	3705.88	-0.000188499	1796.03	0.0001698
1796.67	0.000154969	3704.92	-0.000202462	1796.67	0.000272242
1797.31	0.000166787	3703.95	-0.00020862	1797.31	0.000380845
1797.95	0.000177635	3702.99	-0.00017609	1797.95	0.000485767
1798.6	0.00018705	3702.03	-0.00015288	1798.6	0.000577447
1799.24	0.000195031	3701.06	-0.000153551	1799.24	0.000651909
1799.88	0.000202666	3700.1	-0.000149307	1799.88	0.000709702
1800.53	0.00021171	3699.13	-0.000152789	1800.53	0.000751573
1801.17	0.000223445	3698.17	-0.000161611	1801.17	0.000776449
1801.81	0.000237109	3697.2	-0.000153568	1801.81	0.000783697
1802.45	0.000249991	3696.24	-0.000165505	1802.45	0.000776281
1803.1	0.000258587	3695.28	-0.000204064	1803.1	0.000759716
1803.74	0.000261154	3694.31	-0.000217806	1803.74	0.0007374
1804.38	0.000259657	3693.35	-0.000204004	1804.38	0.000710524
1805.03	0.00025721	3692.38	-0.000188945	1805.03	0.00067844
1805.67	0.000254499	3691.42	-0.000168642	1805.67	0.000639882
1806.31	0.000249452	3690.45	-0.000135734	1806.31	0.000595319
1806.95	0.000240264	3689.49	-0.000109502	1806.95	0.000548768
1807.6	0.000227383	3688.53	-0.000105488	1807.6	0.000504683
1808.24	0.000213223	3687.56	-0.000126771	1808.24	0.000464608
1808.88	0.000200004	3686.6	-0.000171022	1808.88	0.000427015
1809.52	0.000188664	3685.63	-0.00021586	1809.52	0.000389952
1810.17	0.000178279	3684.67	-0.000240564	1810.17	0.000352018
1810.81	0.000166971	3683.7	-0.000232479	1810.81	0.000312677
1811.45	0.000154205	3682.74	-0.000203125	1811.45	0.00027292
1812.1	0.00014153	3681.77	-0.000195853	1812.1	0.000237061
1812.74	0.000131419	3680.81	-0.000218307	1812.74	0.000209452
1813.38	0.000125721	3679.85	-0.000243474	1813.38	0.000188631
1814.02	0.000124078	3678.88	-0.000258972	1814.02	0.000167455
1814.67	0.000124061	3677.92	-0.000248332	1814.67	0.000140826
1815.31	0.000122363	3676.95	-0.000201864	1815.31	0.000111428
1815.95	0.000117256	3675.99	-0.000165029	1815.95	8.59125e-05
1816.6	0.000109603	3675.02	-0.000173674	1816.6	6.7388e-05
1817.24	0.000101895	3674.06	-0.000197147	1817.24	5.22107e-05
1817.88	9.60091e-05	3673.1	-0.000204324	1817.88	3.47629e-05
1818.52	9.1439e-05	3672.13	-0.000192161	1818.52	1.21762e-05
1819.17	8.68444e-05	3671.17	-0.000176061	1819.17	-1.31502e-05
1819.81	8.12871e-05	3670.2	-0.000172465	1819.81	-3.50323e-05
1820.45	7.52148e-05	3669.24	-0.000169531	1820.45	-4.74872e-05
1821.1	6.95372e-05	3668.27	-0.000162863	1821.1	-4.86747e-05
1821.74	6.4404e-05	3667.31	-0.000180924	1821.74	-4.3363e-05
1822.38	5.93392e-05	3666.35	-0.000223783	1822.38	-3.95764e-05
1823.02	5.37176e-05	3665.38	-0.000246854	1823.02	-4.36627e-05
1823.67	4.73316e-05	3664.42	-0.000247068	1823.67	-5.58603e-05
1824.31	4.10314e-05	3663.45	-0.000258917	1824.31	-7.19448e-05
1824.95	3.58013e-05	3662.49	-0.00026891	1824.95	-8.63504e-05
1825.6	3.18807e-05	3661.52	-0.000250523	1825.6	-9.52327e-05
1826.24	2.81977e-05	3660.56	-0.000235195	1826.24	-9.74145e-05
1826.88	2.31887e-05	3659.6	-0.000248063	1826.88	-9.48105e-05
1827.52	1.70037e-05	3658.63	-0.000250498	1827.52	-9.30161e-05
1828.17	1.08211e-05	3657.67	-0.000243042	1828.17	-9.74926e-05
1828.81	5.92322e-06	3656.7	-0.000260069	1828.81	-0.000109395
1829.45	3.72697e-06	3655.74	-0.000277705	1829.45	-0.000122673
1830.09	5.09771e-06	3654.77	-0.000280577	1830.09	-0.000129965
1830.74	9.26172e-06	3653.81	-0.000283671	1830.74	-0.000130147
1831.38	1.29419e-05	3652.85	-0.000292675	1831.38	-0.000129477
1832.02	1.31742e-05	3651.88	-0.000312326	1832.02	-0.000134102
1832.67	9.48297e-06	3650.92	-0.000329506	1832.67	-0.000144007
1833.31	3.82146e-06	3649.95	-0.000338509	1833.31	-0.000154528
1833.95	-1.64839e-06	3648.99	-0.000350405	1833.95	-0.000163295
1834.59	-5.10737e-06	3648.02	-0.000354904	1834.59	-0.000171739
1835.24	-6.15184e-06	3647.06	-0.000332245	1835.24	-0.00018056
1835.88	-5.80871e-06	3646.1	-0.000293188	1835.88	-0.000187561
1836.52	-6.32673e-06	3645.13	-0.000281998	1836.52	-0.00018997
1837.17	-9.46292e-06	3644.17	-0.000314881	1837.17	-0.000188218
1837.81	-1.51414e-05	3643.2	-0.000351869	1837.81	-0.000184863
1838.45	-2.17218e-05	3642.24	-0.000360896	1838.45	-0.000183203
1839.09	-2.71612e-05	3641.27	-0.000347359	1839.09	-0.000185236
1839.74	-3.09219e-05	3640.31	-0.000333992	1839.74	-0.000190985
1840.38	-3.40307e-05	3639.34	-0.000335747	1840.38	-0.000198452
1841.02	-3.893e-05	3638.38	-0.000328605	1841.02	-0.000206103
1841.67	-4.7794e-05	3637.42	-0.000304152	1841.67	-0.000212887
1842.31	-6.05319e-05	3636.45	-0.000298745	1842.31	-0.00021765
1842.95	-7.42366e-05	3635.49	-0.000323394	1842.95	-0.000219229
1843.59	-8.46898e-05	3634.52	-0.000352535	1843.59	-0.000219121
1844.24	-8.95356e-05	3633.56	-0.000349649	1844.24	-0.000223265
1844.88	-9.01586e-05	3632.59	-0.000317272	1844.88	-0.000237719
1845.52	-9.02826e-05	3631.63	-0.000299294	1845.52	-0.000262459
1846.17	-9.23352e-05	3630.67	-0.000296811	1846.17	-0.000292055
1846.81	-9.5883e-05	3629.7	-0.000296117	1846.81	-0.000320352
1847.45	-9.91214e-05	3628.74	-0.000308689	1847.45	-0.000344773
1848.09	-0.000101379	3627.77	-0.000321368	1848.09	-0.00036449
1848.74	-0.000104069	3626.81	-0.000309374	1848.74	-0.000378698
1849.38	-0.00010895	3625.84	-0.000287792	1849.38	-0.000387362
1850.02	-0.000116347	3624.88	-0.000283041	1850.02	-0.000390435
1850.66	-0.000124397	3623.92	-0.000291873	1850.66	-0.000387173
1851.31	-0.000130341	3622.95	-0.000312456	1851.31	-0.000377472
1851.95	-0.000132406	3621.99	-0.000337783	1851.95	-0.000363194
1852.59	-0.000130351	3621.02	-0.000347324	1852.59	-0.000346984
1853.24	-0.000125144	3620.06	-0.000346496	1853.24	-0.000328828
1853.88	-0.00011811	3619.09	-0.000345569	1853.88	-0.000306147
1854.52	-0.000110172	3618.13	-0.000337697	1854.52	-0.000277608
1855.16	-0.000102639	3617.17	-0.000321289	1855.16	-0.000246653
1855.81	-9.63605e-05	3616.2	-0.00031222	1855.81	-0.000218275
1856.45	-9.1841e-05	3615.24	-0.000310147	1856.45	-0.00019511
1857.09	-8.9497e-05	3614.27	-0.000295187	1857.09	-0.000175512
1857.74	-8.96254e-05	3613.31	-0.000280191	1857.74	-0.000157745
1858.38	-9.13758e-05	3612.34	-0.000288099	1858.38	-0.000143657
1859.02	-9.29887e-05	3611.38	-0.000312985	1859.02	-0.000138755
1859.66	-9.33754e-05	3610.42	-0.000336214	1859.66	-0.000146598
1860.31	-9.32502e-05	3609.45	-0.000343471	1860.31	-0.000163396
1860.95	-9.33869e-05	3608.49	-0.00032896	1860.95	-0.000179126
1861.59	-9.29502e-05	3607.52	-0.000307085	1861.59	-0.00018549
1862.24	-9.09704e-05	3606.56	-0.000304326	1862.24	-0.000181995
1862.88	-8.85793e-05	3605.59	-0.000318037	1862.88	-0.000175556
1863.52	-8.7728e-05	3604.63	-0.000331092	1863.52	-0.000172856
1864.16	-8.85201e-05	3603.67	-0.000340156	1864.16	-0.000175214
1864.81	-8.89877e-05	3602.7	-0.00034782	1864.81	-0.000177794
1865.45	-8.7789e-05	3601.74	-0.000364326	1865.45	-0.000175276
1866.09	-8.48935e-05	3600.77	-0.000373976	1866.09	-0.000164763
1866.74	-8.14329e-05	3599.81	-0.000346363	1866.74	-0.000147671
1867.38	-7.83156e-05	3598.84	-0.000307198	1867.38	-0.00012826
1868.02	-7.50343e-05	3597.88	-0.000306838	1868.02	-0.000111902
1868.66	-6.92638e-05	3596.91	-0.000335145	1868.66	-0.000101177
1869.31	-5.90664e-05	3595.95	-0.0003458	1869.31	-9.44141e-05
1869.95	-4.45757e-05	3594.99	-0.000335538	1869.95	-8.71515e-05
1870.59	-2.77582e-05	3594.02	-0.000330162	1870.59	-7.58424e-05
1871.23	-1.07592e-05	3593.06	-0.000333161	1871.23	-6.05838e-05
1871.88	4.33562e-06	3592.09	-0.000328451	1871.88	-4.55929e-05
1872.52	1.57831e-05	3591.13	-0.000310386	1872.52	-3.64276e-05
1873.16	2.35092e-05	3590.16	-0.000295331	1873.16	-3.58002e-05
1873.81	3.03155e-05	3589.2	-0.000294643	1873.81	-4.05144e-05
1874.45	3.82439e-05	3588.24	-0.000310108	1874.45	-4.54143e-05
1875.09	4.56999e-05	3587.27	-0.000333371	1875.09	-4.76168e-05
1875.73	4.94207e-05	3586.31	-0.000331687	1875.73	-4.74422e-05
1876.38	4.85865e-05	3585.34	-0.000307792	1876.38	-4.62764e-05
1877.02	4.54627e-05	3584.38	-0.000299423	1877.02	-4.36426e-05
1877.66	4.17926e-05	3583.41	-0.000303376	1877.66	-3.79911e-05
1878.31	3.6727e-05	3582.45	-0.000309675	1878.31	-2.85472e-05
1878.95	2.97144e-05	3581.49	-0.000317527	1878.95	-1.75385e-05
1879.59	2.28112e-05	3580.52	-0.000299418	1879.59	-8.01247e-06
1880.23	1.93104e-05	3579.56	-0.000270262	1880.23	-1.62844e-07
1880.88	2.01655e-05	3578.59	-0.000276587	1880.88	1.03317e-05
1881.52	2.35137e-05	3577.63	-0.00029674	1881.52	2.88652e-05
1882.16	2.77456e-05	3576.66	-0.000312175	1882.16	5.73451e-05
1882.81	3.39485e-05	3575.7	-0.000341836	1882.81	9.5071e-05
1883.45	4.44915e-05	3574.74	-0.000359963	1883.45	0.00014319
1884.09	6.13113e-05	3573.77	-0.000343448	1884.09	0.000206925
1884.73	8.53465e-05	3572.81	-0.000311795	1884.73	0.000295262
1885.38	0.000117729	3571.84	-0.000278229	1885.38	0.000418631
1886.02	0.000160231	3570.88	-0.000251972	1886.02	0.000588126
1886.66	0.000215118	3569.91	-0.000252981	1886.66	0.000818015
1887.31	0.000286338	3568.95	-0.000274126	1887.31	0.00113
1887.95	0.000381415	3567.99	-0.000277927	1887.95	0.00155
1888.59	0.000511421	3567.02	-0.000260795	1888.59	0.00211
1889.23	0.000687812	3566.06	-0.000237301	1889.23	0.00284
1889.88	0.000920246	3565.09	-0.000217066	1889.88	0.00377
1890.52	0.00122	3564.13	-0.000233753	1890.52	0.00494
1891.16	0.00158	3563.16	-0.000272673	1891.16	0.00635
1891.81	0.00201	3562.2	-0.000277109	1891.81	0.00801
1892.45	0.00251	3561.23	-0.000268406	1892.45	0.00987
1893.09	0.00306	3560.27	-0.000287229	1893.09	0.01185
1893.73	0.00364	3559.31	-0.000309534	1893.73	0.01381
1894.38	0.0042	3558.34	-0.000319501	1894.38	0.01558
1895.02	0.0047	3557.38	-0.000324389	1895.02	0.01693
1895.66	0.00506	3556.41	-0.000319358	1895.66	0.01767
1896.3	0.00522	3555.45	-0.000310739	1896.3	0.01767
1896.95	0.00515	3554.48	-0.000294325	1896.95	0.0169
1897.59	0.00484	3553.52	-0.000255003	1897.59	0.01544
1898.23	0.00433	3552.56	-0.000213381	1898.23	0.01346
1898.88	0.00369	3551.59	-0.00020284	1898.88	0.01121
1899.52	0.00299	3550.63	-0.000226913	1899.52	0.00894
1900.16	0.00233	3549.66	-0.00025458	1900.16	0.00685
1900.8	0.00174	3548.7	-0.000253764	1900.8	0.00507
1901.45	0.00127	3547.73	-0.000227094	1901.45	0.00365
1902.09	0.000910865	3546.77	-0.000208314	1902.09	0.00258
1902.73	0.000645656	3545.81	-0.000218873	1902.73	0.00181
1903.38	0.000456968	3544.84	-0.000232224	1903.38	0.00128
1904.02	0.00032607	3543.88	-0.000225167	1904.02	0.000905913
1904.66	0.00023849	3542.91	-0.000229465	1904.66	0.000648917
1905.3	0.000182769	3541.95	-0.00026904	1905.3	0.000469235
1905.95	0.000148071	3540.98	-0.000298975	1905.95	0.000340997
1906.59	0.000124382	3540.02	-0.000282524	1906.59	0.00024671
1907.23	0.000104696	3539.06	-0.000250705	1907.23	0.00017554
1907.88	8.61643e-05	3538.09	-0.000237526	1907.88	0.000120684
1908.52	6.9636e-05	3537.13	-0.000240466	1908.52	7.7256e-05
1909.16	5.8074e-05	3536.16	-0.000238937	1909.16	4.25654e-05
1909.8	5.45911e-05	3535.2	-0.000231188	1909.8	1.69923e-05
1910.45	5.96323e-05	3534.23	-0.000240501	1910.45	2.74948e-06
1911.09	6.92023e-05	3533.27	-0.000262623	1911.09	1.0737e-06
1911.73	7.77413e-05	3532.31	-0.000267795	1911.73	1.21661e-05
1912.38	8.37571e-05	3531.34	-0.000244554	1912.38	3.83587e-05
1913.02	9.22546e-05	3530.38	-0.000215815	1913.02	8.42857e-05
1913.66	0.000111636	3529.41	-0.000203265	1913.66	0.000156153
1914.3	0.000146698	3528.45	-0.000193693	1914.3	0.000262791
1914.95	0.000196947	3527.48	-0.000184855	1914.95	0.000416313
1915.59	0.000261039	3526.52	-0.000191251	1915.59	0.000633043
1916.23	0.000341953	3525.56	-0.000210688	1916.23	0.000929782
1916.87	0.000446512	3524.59	-0.000239388	1916.87	0.00132
1917.52	0.000579153	3523.63	-0.000271682	1917.52	0.00181
1918.16	0.000736851	3522.66	-0.000287559	1918.16	0.00238
1918.8	0.000909023	3521.7	-0.000281656	1918.8	0.003
1919.45	0.00108	3520.73	-0.000278658	1919.45	0.00362
1920.09	0.00123	3519.77	-0.000282549	1920.09	0.00417
1920.73	0.00134	3518.8	-0.000275958	1920.73	0.00456
1921.37	0.0014	3517.84	-0.000252427	1921.37	0.00473
1922.02	0.00138	3516.88	-0.000209889	1922.02	0.00466
1922.66	0.00131	3515.91	-0.000176435	1922.66	0.00435
1923.3	0.00119	3514.95	-0.000187042	1923.3	0.00386
1923.95	0.00104	3513.98	-0.000234394	1923.95	0.00327
1924.59	0.000875123	3513.02	-0.000271559	1924.59	0.00264
1925.23	0.00071954	3512.05	-0.000246465	1925.23	0.00204
1925.87	0.000579512	3511.09	-0.000193042	1925.87	0.00152
1926.52	0.000461606	3510.13	-0.000195399	1926.52	0.00108
1927.16	0.000368191	3509.16	-0.000248245	1927.16	0.00072061
1927.8	0.000297103	3508.2	-0.000290255	1927.8	0.000443938
1928.45	0.000243632	3507.23	-0.000303205	1928.45	0.000233201
1929.09	0.000202367	3506.27	-0.000297724	1929.09	7.58897e-05
1929.73	0.000169638	3505.3	-0.00027608	1929.73	-3.80916e-05
1930.37	0.000143196	3504.34	-0.000246875	1930.37	-0.000118958
1931.02	0.000121859	3503.38	-0.000230412	1931.02	-0.000180023
1931.66	0.000105314	3502.41	-0.000223829	1931.66	-0.000235667
1932.3	9.24991e-05	3501.45	-0.000210385	1932.3	-0.000295977
1932.95	8.06867e-05	3500.48	-0.000207322	1932.95	-0.000362616
1933.59	6.68195e-05	3499.52	-0.000226697	1933.59	-0.000432938
1934.23	4.97034e-05	3498.55	-0.000237765	1934.23	-0.000505401
1934.87	3.03348e-05	3497.59	-0.000225356	1934.87	-0.000581882
1935.52	9.87389e-06	3496.63	-0.00020708	1935.52	-0.000665012
1936.16	-1.1875e-05	3495.66	-0.000198061	1936.16	-0.000755052
1936.8	-3.60165e-05	3494.7	-0.000199182	1936.8	-0.000848409
1937.44	-6.2493e-05	3493.73	-0.000195555	1937.44	-0.000937843
1938.09	-8.93396e-05	3492.77	-0.000178229	1938.09	-0.00102
1938.73	-0.000115113	3491.8	-0.000169523	1938.73	-0.00109
1939.37	-0.000141066	3490.84	-0.000176604	1939.37	-0.00116
1940.02	-0.000171791	3489.88	-0.000172651	1940.02	-0.00127
1940.66	-0.0002162	3488.91	-0.000166117	1940.66	-0.00145
1941.3	-0.000289137	3487.95	-0.000168582	1941.3	-0.00176
1941.94	-0.000413	3486.98	-0.000159076	1941.94	-0.00229
1942.59	-0.00061865	3486.02	-0.000159528	1942.59	-0.00314
1943.23	-0.000944343	3485.05	-0.000201761	1943.23	-0.0044
1943.87	-0.00143	3484.09	-0.000244555	1943.87	-0.00618
1944.52	-0.0021	3483.13	-0.000243422	1944.52	-0.00849
1945.16	-0.00294	3482.16	-0.000228378	1945.16	-0.01119
1945.8	-0.00386	3481.2	-0.000220654	1945.8	-0.01393
1946.44	-0.0047	3480.23	-0.000202424	1946.44	-0.01618
1947.09	-0.00525	3479.27	-0.000192844	1947.09	-0.01742
1947.73	-0.00537	3478.3	-0.000206846	1947.73	-0.01735
1948.37	-0.00504	3477.34	-0.000212425	1948.37	-0.01607
1949.02	-0.00439	3476.37	-0.000191533	1949.02	-0.01403
1949.66	-0.00361	3475.41	-0.000183195	1949.66	-0.01178
1950.3	-0.00288	3474.45	-0.000215763	1950.3	-0.00977
1950.94	-0.00231	3473.48	-0.000234652	1950.94	-0.00818
1951.59	-0.00189	3472.52	-0.000201265	1951.59	-0.00698
1952.23	-0.00161	3471.55	-0.000167264	1952.23	-0.00603
1952.87	-0.0014	3470.59	-0.00017119	1952.87	-0.0052
1953.52	-0.00123	3469.62	-0.000178035	1953.52	-0.00439
1954.16	-0.00107	3468.66	-0.000170191	1954.16	-0.00359
1954.8	-0.0009133	3467.7	-0.000179002	1954.8	-0.00282
1955.44	-0.000757792	3466.73	-0.000198591	1955.44	-0.00212
1956.09	-0.000605722	3465.77	-0.000205117	1956.09	-0.00154
1956.73	-0.00045946	3464.8	-0.000210019	1956.73	-0.00109
1957.37	-0.000321302	3463.84	-0.000211923	1957.37	-0.000774334
1958.02	-0.000195644	3462.87	-0.000187346	1958.02	-0.000570733
1958.66	-8.93715e-05	3461.91	-0.000155868	1958.66	-0.00045678
1959.3	-8.99757e-06	3460.95	-0.000161611	1959.3	-0.000415405
1959.94	4.13945e-05	3459.98	-0.000195678	1959.94	-0.00043807
1960.59	6.08055e-05	3459.02	-0.000225608	1960.59	-0.000524842
1961.23	5.10231e-05	3458.05	-0.000245737	1961.23	-0.000674976
1961.87	1.72918e-05	3457.09	-0.000247831	1961.87	-0.00087278
1962.51	-3.01369e-05	3456.12	-0.000220791	1962.51	-0.00108
1963.16	-7.6869e-05	3455.16	-0.000190552	1963.16	-0.00126
1963.8	-0.000109956	3454.2	-0.000189616	1963.8	-0.00139
1964.44	-0.000124897	3453.23	-0.000203779	1964.44	-0.00146
1965.09	-0.000129294	3452.27	-0.000205511	1965.09	-0.00152
1965.73	-0.000141668	3451.3	-0.000197051	1965.73	-0.00163
1966.37	-0.000186993	3450.34	-0.000197253	1966.37	-0.00186
1967.01	-0.000290812	3449.37	-0.000202461	1967.01	-0.0023
1967.66	-0.000468173	3448.41	-0.000191079	1967.66	-0.00295
1968.3	-0.000709227	3447.45	-0.000166012	1968.3	-0.00375
1968.94	-0.000968914	3446.48	-0.000142952	1968.94	-0.00453
1969.59	-0.00118	3445.52	-0.00014185	1969.59	-0.00508
1970.23	-0.00126	3444.55	-0.000174576	1970.23	-0.00523
1970.87	-0.00121	3443.59	-0.000208309	1970.87	-0.00495
1971.51	-0.00103	3442.62	-0.000205159	1971.51	-0.00434
1972.16	-0.000802584	3441.66	-0.000176311	1972.16	-0.00362
1972.8	-0.000574855	3440.69	-0.000153258	1972.8	-0.00296
1973.44	-0.000388868	3439.73	-0.000149557	1973.44	-0.00245
1974.09	-0.000255397	3438.77	-0.000161163	1974.09	-0.0021
1974.73	-0.000168197	3437.8	-0.000168534	1974.73	-0.00189
1975.37	-0.000115495	3436.84	-0.000168534	1975.37	-0.00176
1976.01	-8.6176e-05	3435.87	-0.000193368	1976.01	-0.00168
1976.66	-7.02691e-05	3434.91	-0.000236023	1976.66	-0.00159
1977.3	-5.91611e-05	3433.94	-0.000228761	1977.3	-0.00147
1977.94	-4.70843e-05	3432.98	-0.000172488	1977.94	-0.00133
1978.59	-3.20264e-05	3432.02	-0.000163257	1978.59	-0.00116
1979.23	-1.40161e-05	3431.05	-0.000219515	1979.23	-0.000995644
1979.87	6.96225e-06	3430.09	-0.000252685	1979.87	-0.00084563
1980.51	3.12376e-05	3429.12	-0.000237022	1980.51	-0.000717552
1981.16	5.85427e-05	3428.16	-0.000226984	1981.16	-0.000615872
1981.8	8.75973e-05	3427.19	-0.00022791	1981.8	-0.000542133
1982.44	0.000116093	3426.23	-0.00021233	1982.44	-0.000493637
1983.08	0.000141318	3425.27	-0.000207875	1983.08	-0.000464863
1983.73	0.000161159	3424.3	-0.000230748	1983.73	-0.000446737
1984.37	0.00017517	3423.34	-0.000236169	1984.37	-0.000431496
1985.01	0.000184484	3422.37	-0.00020292	1985.01	-0.000414481
1985.66	0.000190712	3421.41	-0.000159519	1985.66	-0.000397318
1986.3	0.000194721	3420.44	-0.000144427	1986.3	-0.000383553
1986.94	0.000196034	3419.48	-0.000180905	1986.94	-0.000374923
1987.58	0.000193849	3418.52	-0.000236567	1987.58	-0.000368975
1988.23	0.000188674	3417.55	-0.000259102	1988.23	-0.000363422
1988.87	0.000182894	3416.59	-0.000256566	1988.87	-0.000358726
1989.51	0.000177838	3415.62	-0.000242899	1989.51	-0.000357428
1990.16	0.000172167	3414.66	-0.00020853	1990.16	-0.000359737
1990.8	0.000163795	3413.69	-0.000174997	1990.8	-0.000363059
1991.44	0.000153634	3412.73	-0.000170601	1991.44	-0.000365055
1992.08	0.000144473	3411.77	-0.000197188	1992.08	-0.00036615
1992.73	0.000137043	3410.8	-0.000232628	1992.73	-0.000370553
1993.37	0.000129185	3409.84	-0.00025912	1993.37	-0.000383636
1994.01	0.000117922	3408.87	-0.000284934	1994.01	-0.000408119
1994.66	0.000102436	3407.91	-0.000307228	1994.66	-0.000440104
1995.3	8.38608e-05	3406.94	-0.000298096	1995.3	-0.000472335
1995.94	6.37195e-05	3405.98	-0.000265445	1995.94	-0.00050169
1996.58	4.29379e-05	3405.02	-0.000260106	1996.58	-0.000531664
1997.23	2.17862e-05	3404.05	-0.000270239	1997.23	-0.000566577
1997.87	9.22477e-07	3403.09	-0.000243583	1997.87	-0.000603688
1998.51	-1.75202e-05	3402.12	-0.000195661	1998.51	-0.000636246
1999.16	-3.04401e-05	3401.16	-0.000169755	1999.16	-0.000657807
1999.8	-3.55997e-05	3400.19	-0.000183713	1999.8	-0.000665696
2000.44	-3.20876e-05	3399.23	-0.000219967	2000.44	-0.000659651
2001.08	-2.10638e-05	3398.26	-0.000230744	2001.08	-0.00064074
2001.73	-5.47633e-06	3397.3	-0.000200005	2001.73	-0.000613818
2002.37	1.06689e-05	3396.34	-0.000175679	2002.37	-0.000586315
2003.01	2.42153e-05	3395.37	-0.00018095	2003.01	-0.000562008
2003.65	3.42117e-05	3394.41	-0.00017645	2003.65	-0.000535525
2004.3	4.09735e-05	3393.44	-0.000170917	2004.3	-0.000499109
2004.94	4.54271e-05	3392.48	-0.000190958	2004.94	-0.000451823
2005.58	4.94823e-05	3391.51	-0.000205736	2005.58	-0.000403232
2006.23	5.45574e-05	3390.55	-0.000212757	2006.23	-0.000364349
2006.87	6.00589e-05	3389.59	-0.000230521	2006.87	-0.000339188
2007.51	6.33666e-05	3388.62	-0.000233178	2007.51	-0.000325293
2008.15	6.22034e-05	3387.66	-0.000213254	2008.15	-0.000320702
2008.8	5.66016e-05	3386.69	-0.000195015	2008.8	-0.000325759
2009.44	4.80689e-05	3385.73	-0.0001763	2009.44	-0.000340427
2010.08	3.78297e-05	3384.76	-0.000163529	2010.08	-0.000359728
2010.73	2.6587e-05	3383.8	-0.000164353	2010.73	-0.000376428
2011.37	1.55802e-05	3382.84	-0.000158075	2011.37	-0.000387129
2012.01	7.0769e-06	3381.87	-0.000161729	2012.01	-0.000394678
2012.65	2.92742e-06	3380.91	-0.000191285	2012.65	-0.000403797
2013.3	1.77835e-06	3379.94	-0.000206062	2013.3	-0.000413766
2013.94	1.13062e-08	3378.98	-0.000184461	2013.94	-0.000418741
2014.58	-5.18745e-06	3378.01	-0.000155862	2014.58	-0.000412159
2015.23	-1.32193e-05	3377.05	-0.00015325	2015.23	-0.000390355
2015.87	-2.12207e-05	3376.09	-0.000175807	2015.87	-0.000354297
2016.51	-2.62833e-05	3375.12	-0.000192129	2016.51	-0.000308336
2017.15	-2.73616e-05	3374.16	-0.00017749	2017.15	-0.00025955
2017.8	-2.54664e-05	3373.19	-0.000148588	2017.8	-0.000212864
2018.44	-2.13848e-05	3372.23	-0.000133681	2018.44	-0.000168465
2019.08	-1.35946e-05	3371.26	-0.000133505	2019.08	-0.000123438
2019.73	7.23069e-07	3370.3	-0.000145997	2019.73	-7.54075e-05
2020.37	2.26881e-05	3369.34	-0.000175796	2020.37	-2.21529e-05
2021.01	5.12748e-05	3368.37	-0.000205204	2021.01	4.18241e-05
2021.65	8.61576e-05	3367.41	-0.000198096	2021.65	0.000124928
2022.3	0.000128993	3366.44	-0.000163143	2022.3	0.000233902
2022.94	0.000182689	3365.48	-0.00014484	2022.94	0.000370227
2023.58	0.000249393	3364.51	-0.00015436	2023.58	0.00053246
2024.23	0.000329704	3363.55	-0.000194264	2024.23	0.000720629
2024.87	0.000421165	3362.59	-0.000245806	2024.87	0.000937157
2025.51	0.000517892	3361.62	-0.000253645	2025.51	0.00118
2026.15	0.000613555	3360.66	-0.000232258	2026.15	0.00146
2026.8	0.000706099	3359.69	-0.000240784	2026.8	0.00176
2027.44	0.000797239	3358.73	-0.000270298	2027.44	0.00208
2028.08	0.00088732	3357.76	-0.000282906	2028.08	0.00242
2028.72	0.000971741	3356.8	-0.00027562	2028.72	0.00274
2029.37	0.00104	3355.83	-0.000259703	2029.37	0.00305
2030.01	0.00109	3354.87	-0.000234282	2030.01	0.00331
2030.65	0.00111	3353.91	-0.000211284	2030.65	0.00352
2031.3	0.00111	3352.94	-0.000215006	2031.3	0.00365
2031.94	0.00108	3351.98	-0.000238229	2031.94	0.00371
2032.58	0.00102	3351.01	-0.000257632	2032.58	0.00368
2033.22	0.000951029	3350.05	-0.000248757	2033.22	0.00356
2033.87	0.000862276	3349.08	-0.000207038	2033.87	0.00336
2034.51	0.000762571	3348.12	-0.000179011	2034.51	0.0031
2035.15	0.000655237	3347.16	-0.000192999	2035.15	0.00279
2035.8	0.000544643	3346.19	-0.000216848	2035.8	0.00246
2036.44	0.000436749	3345.23	-0.000213351	2036.44	0.00214
2037.08	0.000338053	3344.26	-0.000186129	2037.08	0.00183
2037.72	0.000253741	3343.3	-0.000174367	2037.72	0.00155
2038.37	0.000185261	3342.33	-0.00019646	2038.37	0.00129
2039.01	0.000130079	3341.37	-0.000223104	2039.01	0.00106
2039.65	8.40977e-05	3340.41	-0.000229501	2039.65	0.000843637
2040.3	4.47254e-05	3339.44	-0.000224744	2040.3	0.000661554
2040.94	1.14706e-05	3338.48	-0.000207521	2040.94	0.000507278
2041.58	-1.63221e-05	3337.51	-0.000173727	2041.58	0.000375391
2042.22	-3.92038e-05	3336.55	-0.000154319	2042.22	0.000263525
2042.87	-5.73681e-05	3335.58	-0.000166532	2042.87	0.000171232
2043.51	-7.02935e-05	3334.62	-0.000192622	2043.51	9.63212e-05
2044.15	-7.87102e-05	3333.66	-0.000216858	2044.15	3.66701e-05
2044.8	-8.45556e-05	3332.69	-0.000227239	2044.8	-8.49674e-06
2045.44	-8.91412e-05	3331.73	-0.000222338	2045.44	-4.10121e-05
2046.08	-9.1782e-05	3330.76	-0.000216897	2046.08	-6.4445e-05
2046.72	-9.0899e-05	3329.8	-0.000209501	2046.72	-8.11796e-05
2047.37	-8.58669e-05	3328.83	-0.00018903	2047.37	-8.90777e-05
2048.01	-7.78487e-05	3327.87	-0.000163835	2048.01	-8.64257e-05
2048.65	-6.81565e-05	3326.91	-0.00014818	2048.65	-7.65318e-05
2049.29	-5.69404e-05	3325.94	-0.000147657	2049.29	-6.25401e-05
2049.94	-4.39778e-05	3324.98	-0.00014795	2049.94	-4.10235e-05
2050.58	-2.91209e-05	3324.01	-0.000136654	2050.58	-3.29478e-06
2051.22	-1.20282e-05	3323.05	-0.000133382	2051.22	5.65619e-05
2051.87	8.40157e-06	3322.08	-0.000150043	2051.87	0.000135723
2052.51	3.23457e-05	3321.12	-0.00017418	2052.51	0.000225656
2053.15	5.71652e-05	3320.15	-0.000188899	2053.15	0.000315373
2053.79	7.82538e-05	3319.19	-0.000179204	2053.79	0.000393973
2054.44	9.31956e-05	3318.23	-0.000160824	2054.44	0.000451971
2055.08	0.000103896	3317.26	-0.000156514	2055.08	0.000484413
2055.72	0.000115256	3316.3	-0.000153256	2055.72	0.000496208
2056.37	0.00013286	3315.33	-0.000152792	2056.37	0.000503562
2057.01	0.000162072	3314.37	-0.000174183	2057.01	0.000532193
2057.65	0.000208535	3313.4	-0.000201649	2057.65	0.000611807
2058.29	0.000278581	3312.44	-0.000210847	2058.29	0.000770172
2058.94	0.000377959	3311.48	-0.000192444	2058.94	0.00103
2059.58	0.000508023	3310.51	-0.000158024	2059.58	0.0014
2060.22	0.000661392	3309.55	-0.000136093	2060.22	0.00187
2060.87	0.000819334	3308.58	-0.000144292	2060.87	0.0024
2061.51	0.000954263	3307.62	-0.000175136	2061.51	0.00293
2062.15	0.00104	3306.65	-0.000181482	2062.15	0.00337
2062.79	0.00105	3305.69	-0.000145298	2062.79	0.00365
2063.44	0.000999585	3304.73	-0.000115308	2063.44	0.00371
2064.08	0.000888874	3303.76	-0.000111905	2064.08	0.00353
2064.72	0.000739145	3302.8	-0.000127269	2064.72	0.00314
2065.37	0.000567664	3301.83	-0.000154203	2065.37	0.0026
2066.01	0.000390118	3300.87	-0.000161203	2066.01	0.00199
2066.65	0.000218604	3299.9	-0.000135356	2066.65	0.00137
2067.29	5.93013e-05	3298.94	-9.97594e-05	2067.29	0.00078593
2067.94	-8.74515e-05	3297.98	-7.81024e-05	2067.94	0.000250293
2068.58	-0.000224773	3297.01	-7.82849e-05	2068.58	-0.000234736
2069.22	-0.000356854	3296.05	-8.68981e-05	2069.22	-0.000676973
2069.86	-0.000485904	3295.08	-7.71562e-05	2069.86	-0.00109
2070.51	-0.000608919	3294.12	-4.19776e-05	2070.51	-0.00147
2071.15	-0.00071781	3293.15	-2.51172e-05	2071.15	-0.00183
2071.79	-0.000804491	3292.19	-4.78413e-05	2071.79	-0.00215
2072.44	-0.000865107	3291.23	-4.83754e-05	2072.44	-0.00242
2073.08	-0.000900423	3290.26	-8.0622e-06	2073.08	-0.00262
2073.72	-0.000912366	3289.3	2.5394e-06	2073.72	-0.00274
2074.36	-0.000902356	3288.33	-3.22418e-05	2074.36	-0.00281
2075.01	-0.000871649	3287.37	-5.63224e-05	2075.01	-0.00281
2075.65	-0.00082323	3286.4	-4.74456e-05	2075.65	-0.00275
2076.29	-0.000763944	3285.44	-3.51794e-05	2076.29	-0.00265
2076.94	-0.000704882	3284.48	-5.05756e-05	2076.94	-0.0025
2077.58	-0.000659967	3283.51	-8.01425e-05	2077.58	-0.00235
2078.22	-0.000641139	3282.55	-8.72437e-05	2078.22	-0.00222
2078.86	-0.000653171	3281.58	-7.68919e-05	2078.86	-0.00216
2079.51	-0.000690183	3280.62	-7.31187e-05	2079.51	-0.0022
2080.15	-0.000737486	3279.65	-6.76058e-05	2080.15	-0.00231
2080.79	-0.000777443	3278.69	-5.76742e-05	2080.79	-0.00246
2081.44	-0.000794069	3277.72	-5.81599e-05	2081.44	-0.00259
2082.08	-0.000776074	3276.76	-6.4762e-05	2082.08	-0.00264
2082.72	-0.000719708	3275.8	-7.71425e-05	2082.72	-0.00258
2083.36	-0.000631471	3274.83	-0.000110662	2083.36	-0.00241
2084.01	-0.000525794	3273.87	-0.000163772	2084.01	-0.00215
2084.65	-0.000418908	3272.9	-0.000211738	2084.65	-0.00184
2085.29	-0.00032244	3271.94	-0.000223723	2085.29	-0.00152
2085.94	-0.00024155	3270.97	-0.000206499	2085.94	-0.00122
2086.58	-0.000177137	3270.01	-0.000181608	2086.58	-0.000964876
2087.22	-0.000127849	3269.05	-0.000125687	2087.22	-0.000749408
2087.86	-9.13048e-05	3268.08	-5.67426e-05	2087.86	-0.000571898
2088.51	-6.36203e-05	3267.12	-4.94198e-05	2088.51	-0.000430371
2089.15	-4.0701e-05	3266.15	-0.000108555	2089.15	-0.000324143
2089.79	-2.03896e-05	3265.19	-0.000181946	2089.79	-0.00024992
2090.43	-4.07529e-06	3264.22	-0.00022921	2090.43	-0.00020067
2091.08	5.07963e-06	3263.26	-0.000245245	2091.08	-0.000166721
2091.72	6.5656e-06	3262.3	-0.000255772	2091.72	-0.000141295
2092.36	3.83693e-06	3261.33	-0.00027022	2092.36	-0.000122604
2093.01	1.37637e-06	3260.37	-0.000280737	2093.01	-0.000111355
2093.65	9.84689e-07	3259.4	-0.000274519	2093.65	-0.000107549
2094.29	4.99212e-07	3258.44	-0.000251929	2094.29	-0.000107171
2094.93	-2.94281e-06	3257.47	-0.000239759	2094.93	-0.000104343
2095.58	-9.70042e-06	3256.51	-0.000232162	2095.58	-9.48767e-05
2096.22	-1.68541e-05	3255.55	-0.000214137	2096.22	-7.90571e-05
2096.86	-2.13201e-05	3254.58	-0.000213247	2096.86	-6.26062e-05
2097.51	-2.14151e-05	3253.62	-0.000222574	2097.51	-5.27814e-05
2098.15	-1.7005e-05	3252.65	-0.000213567	2098.15	-5.37925e-05
2098.79	-9.37091e-06	3251.69	-0.000221935	2098.79	-6.35613e-05
2099.43	-1.58186e-06	3250.72	-0.000265503	2099.43	-7.48985e-05
2100.08	3.05527e-06	3249.76	-0.000283177	2100.08	-7.85732e-05
2100.72	4.24405e-06	3248.8	-0.000250181	2100.72	-7.11288e-05
2101.36	5.41379e-06	3247.83	-0.000223072	2101.36	-5.83474e-05
2102.01	9.54727e-06	3246.87	-0.000237999	2102.01	-4.82464e-05
2102.65	1.50978e-05	3245.9	-0.000265596	2102.65	-4.19586e-05
2103.29	1.81351e-05	3244.94	-0.000267144	2103.29	-3.23097e-05
2103.93	1.68602e-05	3243.97	-0.000253118	2103.93	-1.46212e-05
2104.58	1.28723e-05	3243.01	-0.000262165	2104.58	7.09059e-06
2105.22	8.99304e-06	3242.05	-0.000284083	2105.22	2.51063e-05
2105.86	6.65883e-06	3241.08	-0.000281963	2105.86	3.59312e-05
2106.51	6.24882e-06	3240.12	-0.000264479	2106.51	4.22618e-05
2107.15	7.45736e-06	3239.15	-0.000267188	2107.15	4.79867e-05
2107.79	9.05565e-06	3238.19	-0.000295006	2107.79	5.47298e-05
2108.43	9.7262e-06	3237.22	-0.000315802	2108.43	6.14473e-05
2109.08	9.5232e-06	3236.26	-0.000325126	2109.08	6.62985e-05
2109.72	9.84273e-06	3235.29	-0.000341027	2109.72	6.83215e-05
2110.36	1.0979e-05	3234.33	-0.000344486	2110.36	6.93861e-05
2111.01	1.11558e-05	3233.37	-0.000317135	2111.01	7.15777e-05
2111.65	8.62769e-06	3232.4	-0.000276316	2111.65	7.58793e-05
2112.29	4.37689e-06	3231.44	-0.000265823	2112.29	8.01594e-05
2112.93	6.682e-07	3230.47	-0.000298434	2112.93	8.13478e-05
2113.58	-2.0506e-06	3229.51	-0.00032743	2113.58	7.94885e-05
2114.22	-5.01453e-06	3228.54	-0.000340616	2114.22	7.92973e-05
2114.86	-8.42939e-06	3227.58	-0.000357778	2114.86	8.47296e-05
2115.5	-1.10545e-05	3226.62	-0.000369626	2115.5	9.39074e-05
2116.15	-1.22888e-05	3225.65	-0.000372737	2116.15	0.000100467
2116.79	-1.32288e-05	3224.69	-0.000367128	2116.79	0.000100773
2117.43	-1.52679e-05	3223.72	-0.000348645	2117.43	9.8116e-05
2118.08	-1.877e-05	3222.76	-0.000335596	2118.08	9.77716e-05
2118.72	-2.30696e-05	3221.79	-0.000348015	2118.72	0.000102213
2119.36	-2.70082e-05	3220.83	-0.000372574	2119.36	0.000109449
		3219.87	-0.000372259
		3218.9	-0.000338917
		3217.94	-0.000306658
		3216.97	-0.000298335
		3216.01	-0.000307168
		3215.04	-0.00032562
		3214.08	-0.000341823
		3213.12	-0.000343088
		3212.15	-0.000342045
		3211.19	-0.000340972
		3210.22	-0.000317291
		3209.26	-0.000288767
		3208.29	-0.00029901
		3207.33	-0.000339747
		3206.37	-0.000361876
		3205.4	-0.000347576
		3204.44	-0.000325368
		3203.47	-0.000311686
		3202.51	-0.000302132
		3201.54	-0.000298239
		3200.58	-0.000294634
		3199.61	-0.000292112
		3198.65	-0.000286016
		3197.69	-0.0002582
		3196.72	-0.000230121
		3195.76	-0.000238928
		3194.79	-0.000282136
		3193.83	-0.000327525
		3192.86	-0.000347222
		3191.9	-0.000344407
		3190.94	-0.000331207
		3189.97	-0.000307117
		3189.01	-0.000283671
		3188.04	-0.00028208
		3187.08	-0.000299019
		3186.11	-0.000314236
		3185.15	-0.000315247
		3184.19	-0.000302308
		3183.22	-0.00028777
		3182.26	-0.000278835
		3181.29	-0.000278124
		3180.33	-0.000285895
		3179.36	-0.000290706
		3178.4	-0.000291299
		3177.44	-0.000286249
		3176.47	-0.000277718
		3175.51	-0.000292524
		3174.54	-0.00033102
		3173.58	-0.000352199
		3172.61	-0.000343422
		3171.65	-0.000334652
		3170.69	-0.000333699
		3169.72	-0.000339276
		3168.76	-0.00035783
		3167.79	-0.000364255
		3166.83	-0.000356402
		3165.86	-0.00035468
		3164.9	-0.000340899
		3163.94	-0.000327524
		3162.97	-0.000348535
		3162.01	-0.00036318
		3161.04	-0.000332632
		3160.08	-0.000299802
		3159.11	-0.00028818
		3158.15	-0.000274874
		3157.18	-0.00027467
		3156.22	-0.000298983
		3155.26	-0.000310743
		3154.29	-0.000300642
		3153.33	-0.000301462
		3152.36	-0.000325094
		3151.4	-0.000353557
		3150.43	-0.000362731
		3149.47	-0.000362906
		3148.51	-0.000385636
		3147.54	-0.000397865
		3146.58	-0.000369171
		3145.61	-0.000348259
		3144.65	-0.000346702
		3143.68	-0.000334563
		3142.72	-0.000324603
		3141.76	-0.000326801
		3140.79	-0.000330183
		3139.83	-0.000326385
		3138.86	-0.000312737
		3137.9	-0.000312808
		3136.93	-0.000336578
		3135.97	-0.000351757
		3135.01	-0.000348917
		3134.04	-0.000344329
		3133.08	-0.000335599
		3132.11	-0.000331683
		3131.15	-0.000344022
		3130.18	-0.000341438
		3129.22	-0.000309527
		3128.26	-0.000279794
		3127.29	-0.00027381
		3126.33	-0.000289979
		3125.36	-0.000309558
		3124.4	-0.000311704
		3123.43	-0.000303961
		3122.47	-0.000307314
		3121.51	-0.000311537
		3120.54	-0.000293248
		3119.58	-0.000272503
		3118.61	-0.000285224
		3117.65	-0.000328125
		3116.68	-0.000350214
		3115.72	-0.000308799
		3114.75	-0.000244522
		3113.79	-0.000221899
		3112.83	-0.000242495
		3111.86	-0.000271021
		3110.9	-0.000275965
		3109.93	-0.000260495
		3108.97	-0.000270507
		3108	-0.00031458
		3107.04	-0.000339631
		3106.08	-0.000330674
		3105.11	-0.000317713
		3104.15	-0.000302849
		3103.18	-0.000276588
		3102.22	-0.000260961
		3101.25	-0.000271148
		3100.29	-0.000271135
		3099.33	-0.000232051
		3098.36	-0.000188067
		3097.4	-0.000175694
		3096.43	-0.000190379
		3095.47	-0.000219182
		3094.5	-0.000240501
		3093.54	-0.000234484
		3092.58	-0.000214424
		3091.61	-0.000188298
		3090.65	-0.000155105
		3089.68	-0.00014074
		3088.72	-0.000164397
		3087.75	-0.000200829
		3086.79	-0.000213432
		3085.83	-0.000210764
		3084.86	-0.000210926
		3083.9	-0.00019922
		3082.93	-0.000182204
		3081.97	-0.000187043
		3081	-0.00020681
		3080.04	-0.000211169
		3079.07	-0.000198415
		3078.11	-0.000192943
		3077.15	-0.000191126
		3076.18	-0.000177719
		3075.22	-0.000166467
		3074.25	-0.000169931
		3073.29	-0.000188042
		3072.32	-0.000211675
		3071.36	-0.000218954
		3070.4	-0.00021273
		3069.43	-0.000203659
		3068.47	-0.000173765
		3067.5	-0.000134336
		3066.54	-0.000126901
		3065.57	-0.000144926
		3064.61	-0.000154167
		3063.65	-0.000159328
		3062.68	-0.000181776
		3061.72	-0.000209846
		3060.75	-0.000216456
		3059.79	-0.000200684
		3058.82	-0.000186533
		3057.86	-0.000186116
		3056.9	-0.000185454
		3055.93	-0.000187188
		3054.97	-0.000209614
		3054	-0.000222884
		3053.04	-0.000198355
		3052.07	-0.000164425
		3051.11	-0.000137732
		3050.15	-0.000123333
		3049.18	-0.000134448
		3048.22	-0.000147405
		3047.25	-0.000134222
		3046.29	-0.000107013
		3045.32	-8.7054e-05
		3044.36	-7.98315e-05
		3043.4	-8.11741e-05
		3042.43	-8.19601e-05
		3041.47	-7.40371e-05
		3040.5	-7.281e-05
		3039.54	-7.91414e-05
		3038.57	-6.2406e-05
		3037.61	-3.95168e-05
		3036.64	-4.66399e-05
		3035.68	-7.34305e-05
		3034.72	-9.49386e-05
		3033.75	-8.45696e-05
		3032.79	-4.8525e-05
		3031.82	-3.39282e-05
		3030.86	-4.6309e-05
		3029.89	-5.98489e-05
		3028.93	-6.34681e-05
		3027.97	-5.06164e-05
		3027	-3.20687e-05
		3026.04	-1.57649e-05
		3025.07	-1.4899e-06
		3024.11	-1.08203e-05
		3023.14	-3.57811e-05
		3022.18	-2.87668e-05
		3021.22	1.487e-07
		3020.25	-4.0311e-06
		3019.29	-2.36694e-05
		3018.32	-1.76478e-05
		3017.36	-1.43789e-05
		3016.39	-3.09354e-05
		3015.43	-3.57353e-05
		3014.47	-1.70337e-05
		3013.5	-2.1843e-06
		3012.54	-1.21571e-05
		3011.57	-3.22049e-05
		3010.61	-4.68779e-05
		3009.64	-5.44403e-05
		3008.68	-4.71361e-05
		3007.72	-1.81515e-05
		3006.75	4.8139e-06
		3005.79	-1.35187e-05
		3004.82	-4.56645e-05
		3003.86	-5.5026e-05
		3002.89	-5.58496e-05
		3001.93	-5.82879e-05
		3000.97	-4.07107e-05
		3000	-1.9139e-06
		2999.04	1.03337e-05
		2998.07	-2.38854e-05
		2997.11	-5.35677e-05
		2996.14	-4.36701e-05
		2995.18	-1.89529e-05
		2994.21	-5.1509e-06
		2993.25	-3.4194e-06
		2992.29	-2.23113e-05
		2991.32	-6.70183e-05
		2990.36	-0.000103109
		2989.39	-0.000103386
		2988.43	-9.03472e-05
		2987.46	-6.16684e-05
		2986.5	5.3e-07
		2985.54	4.90339e-05
		2984.57	5.33127e-05
		2983.61	5.36201e-05
		2982.64	6.50917e-05
		2981.68	5.18654e-05
		2980.71	1.36413e-05
		2979.75	-7.6253e-06
		2978.79	-1.37754e-05
		2977.82	-2.32525e-05
		2976.86	-1.91177e-05
		2975.89	1.7638e-06
		2974.93	2.29702e-05
		2973.96	4.16508e-05
		2973	6.90971e-05
		2972.04	0.000112184
		2971.07	0.000146915
		2970.11	0.000140309
		2969.14	0.000110162
		2968.18	0.000106347
		2967.21	0.000140432
		2966.25	0.00017913
		2965.29	0.000194452
		2964.32	0.000193545
		2963.36	0.000187132
		2962.39	0.000164828
		2961.43	0.000140119
		2960.46	0.000146804
		2959.5	0.000165933
		2958.53	0.000158312
		2957.57	0.000137219
		2956.61	0.000122305
		2955.64	0.000109222
		2954.68	0.000103043
		2953.71	0.000113874
		2952.75	0.000137888
		2951.78	0.000153031
		2950.82	0.000149737
		2949.86	0.000141715
		2948.89	0.00013133
		2947.93	0.000123743
		2946.96	0.000132615
		2946	0.000146728
		2945.03	0.00014986
		2944.07	0.000155581
		2943.11	0.000177673
		2942.14	0.000189691
		2941.18	0.000182465
		2940.21	0.00019045
		2939.25	0.000219121
		2938.28	0.00024064
		2937.32	0.000230456
		2936.36	0.000202461
		2935.39	0.000195774
		2934.43	0.000201824
		2933.46	0.000196807
		2932.5	0.000184085
		2931.53	0.000173014
		2930.57	0.000179304
		2929.61	0.000193944
		2928.64	0.000191378
		2927.68	0.000184156
		2926.71	0.000191666
		2925.75	0.000203941
		2924.78	0.000217043
		2923.82	0.000229129
		2922.86	0.000230237
		2921.89	0.000227532
		2920.93	0.000218521
		2919.96	0.000197046
		2919	0.000188136
		2918.03	0.000201413
		2917.07	0.000216913
		2916.1	0.000237424
		2915.14	0.000266144
		2914.18	0.000273
		2913.21	0.000254159
		2912.25	0.00024094
		2911.28	0.00023969
		2910.32	0.00024242
		2909.35	0.000256151
		2908.39	0.000275579
		2907.43	0.000279059
		2906.46	0.000267419
		2905.5	0.000260237
		2904.53	0.000264805
		2903.57	0.000258017
		2902.6	0.000219164
		2901.64	0.000189815
		2900.68	0.000213205
		2899.71	0.000251783
		2898.75	0.000251543
		2897.78	0.000234481
		2896.82	0.000234101
		2895.85	0.000220221
		2894.89	0.000190999
		2893.93	0.000193
		2892.96	0.000228635
		2892	0.000256039
		2891.03	0.000250912
		2890.07	0.000235955
		2889.1	0.000227034
		2888.14	0.000211357
		2887.18	0.000197466
		2886.21	0.000206421
		2885.25	0.000233032
		2884.28	0.000244279
		2883.32	0.00023559
		2882.35	0.000234489
		2881.39	0.000250314
		2880.43	0.000283177
		2879.46	0.000316097
		2878.5	0.000318307
		2877.53	0.000300051
		2876.57	0.000298059
		2875.6	0.00031205
		2874.64	0.000304703
		2873.67	0.000273029
		2872.71	0.000261291
		2871.75	0.000278878
		2870.78	0.000293116
		2869.82	0.000306471
		2868.85	0.000327157
		2867.89	0.000320129
		2866.92	0.00028679
		2865.96	0.000271242
		2865	0.000258765
		2864.03	0.000223852
		2863.07	0.000204622
		2862.1	0.000223601
		2861.14	0.000250868
		2860.17	0.000268005
		2859.21	0.00028251
		2858.25	0.00029592
		2857.28	0.000294454
		2856.32	0.000277125
		2855.35	0.000258128
		2854.39	0.000240973
		2853.42	0.000239554
		2852.46	0.000266867
		2851.5	0.000293924
		2850.53	0.000301591
		2849.57	0.000312086
		2848.6	0.00032952
		2847.64	0.000335187
		2846.67	0.000329329
		2845.71	0.000320344
		2844.75	0.000319343
		2843.78	0.000329114
		2842.82	0.000341331
		2841.85	0.000360985
		2840.89	0.00038904
		2839.92	0.000418829
		2838.96	0.000435576
		2837.99	0.000420967
		2837.03	0.000400199
		2836.07	0.000400977
		2835.1	0.000390388
		2834.14	0.000346201
		2833.17	0.000322114
		2832.21	0.000353277
		2831.24	0.000395058
		2830.28	0.00040976
		2829.32	0.000411669
		2828.35	0.000422844
		2827.39	0.000429401
		2826.42	0.000409576
		2825.46	0.000379142
		2824.49	0.000351189
		2823.53	0.000331059
		2822.57	0.000341521
		2821.6	0.000369112
		2820.64	0.000373466
		2819.67	0.000367402
		2818.71	0.000372391
		2817.74	0.000366395
		2816.78	0.000355691
		2815.82	0.000359272
		2814.85	0.000354164
		2813.89	0.000328088
		2812.92	0.000303294
		2811.96	0.000309777
		2810.99	0.00034067
		2810.03	0.000357764
		2809.07	0.000354592
		2808.1	0.000338368
		2807.14	0.000330378
		2806.17	0.000362496
		2805.21	0.00039773
		2804.24	0.000391942
		2803.28	0.000374799
		2802.32	0.000362597
		2801.35	0.000332185
		2800.39	0.00030232
		2799.42	0.000313576
		2798.46	0.000343369
		2797.49	0.000338947
		2796.53	0.000303762
		2795.56	0.000284589
		2794.6	0.000293023
		2793.64	0.000305812
		2792.67	0.000316742
		2791.71	0.000322244
		2790.74	0.000327871
		2789.78	0.000361619
		2788.81	0.000400018
		2787.85	0.000400964
		2786.89	0.000390317
		2785.92	0.000394514
		2784.96	0.000396126
		2783.99	0.00038279
		2783.03	0.000363212
		2782.06	0.000357023
		2781.1	0.000355961
		2780.14	0.00033828
		2779.17	0.000320679
		2778.21	0.000313167
		2777.24	0.000306326
		2776.28	0.000312575
		2775.31	0.000332983
		2774.35	0.000343857
		2773.39	0.000344234
		2772.42	0.000346909
		2771.46	0.000339091
		2770.49	0.000314669
		2769.53	0.000300429
		2768.56	0.000308477
		2767.6	0.000314466
		2766.64	0.000311734
		2765.67	0.00033249
		2764.71	0.000360103
		2763.74	0.000330138
		2762.78	0.000266372
		2761.81	0.000239941
		2760.85	0.000240185
		2759.89	0.000237195
		2758.92	0.000251124
		2757.96	0.000297794
		2756.99	0.000338477
		2756.03	0.000338272
		2755.06	0.000320321
		2754.1	0.00029548
		2753.13	0.000252918
		2752.17	0.000227971
		2751.21	0.000254004
		2750.24	0.000291055
		2749.28	0.000286325
		2748.31	0.000263248
		2747.35	0.000264457
		2746.38	0.000260507
		2745.42	0.00022141
		2744.46	0.000198634
		2743.49	0.000224533
		2742.53	0.000246139
		2741.56	0.000238696
		2740.6	0.000236619
		2739.63	0.00025477
		2738.67	0.000277411
		2737.71	0.00028892
		2736.74	0.000295867
		2735.78	0.000302197
		2734.81	0.000296136
		2733.85	0.000281439
		2732.88	0.000265045
		2731.92	0.00024304
		2730.96	0.000213976
		2729.99	0.000182576
		2729.03	0.000180293
		2728.06	0.000224083
		2727.1	0.000272592
		2726.14	0.000295887
		2725.17	0.000290418
		2724.21	0.000258826
		2723.24	0.000223817
		2722.28	0.00020345
		2721.31	0.000207404
		2720.35	0.000230236
		2719.39	0.000251599
		2718.42	0.000250928
		2717.46	0.000214267
		2716.49	0.000174865
		2715.53	0.000176505
		2714.56	0.000206479
		2713.6	0.000230774
		2712.64	0.000238509
		2711.67	0.000230599
		2710.71	0.000216576
		2709.74	0.00022659
		2708.78	0.000252409
		2707.81	0.000245755
		2706.85	0.000228967
		2705.88	0.000254463
		2704.92	0.000276703
		2703.96	0.000242439
		2702.99	0.000207661
		2702.03	0.00023264
		2701.06	0.000278842
		2700.1	0.000284695
		2699.13	0.000276737
		2698.17	0.000302478
		2697.21	0.000303526
		2696.24	0.000235026
		2695.28	0.000187709
		2694.31	0.000222128
		2693.35	0.000268135
		2692.38	0.000273478
		2691.42	0.00025671
		2690.46	0.000222417
		2689.49	0.000188195
		2688.53	0.000194644
		2687.56	0.000229487
		2686.6	0.000248463
		2685.63	0.000245877
		2684.67	0.000237951
		2683.71	0.000228658
		2682.74	0.000233159
		2681.78	0.000256756
		2680.81	0.000270897
		2679.85	0.000272531
		2678.88	0.000274624
		2677.92	0.000265956
		2676.96	0.000248607
		2675.99	0.000239231
		2675.03	0.000237659
		2674.06	0.000234964
		2673.1	0.000228215
		2672.13	0.00022553
		2671.17	0.000229355
		2670.21	0.000226008
		2669.24	0.000213891
		2668.28	0.000217168
		2667.31	0.00024141
		2666.35	0.000254913
		2665.38	0.000240175
		2664.42	0.000220776
		2663.45	0.000229003
		2662.49	0.000260534
		2661.53	0.000274787
		2660.56	0.000250741
		2659.6	0.000208927
		2658.63	0.00018105
		2657.67	0.000169487
		2656.7	0.00016101
		2655.74	0.000165001
		2654.78	0.00018919
		2653.81	0.000223849
		2652.85	0.00025684
		2651.88	0.000269337
		2650.92	0.000259773
		2649.95	0.000240477
		2648.99	0.000213623
		2648.03	0.000187834
		2647.06	0.000189297
		2646.1	0.000231112
		2645.13	0.00027121
		2644.17	0.000267729
		2643.2	0.000251089
		2642.24	0.000238378
		2641.28	0.000205074
		2640.31	0.000182076
		2639.35	0.000201755
		2638.38	0.000216899
		2637.42	0.00019188
		2636.45	0.000151683
		2635.49	0.000130337
		2634.53	0.000143984
		2633.56	0.000172649
		2632.6	0.000183061
		2631.63	0.000167092
		2630.67	0.000141249
		2629.7	0.000130044
		2628.74	0.000130674
		2627.78	0.000135275
		2626.81	0.000141604
		2625.85	0.000130731
		2624.88	0.000122844
		2623.92	0.000152492
		2622.95	0.000187748
		2621.99	0.000196356
		2621.02	0.000178076
		2620.06	0.000139543
		2619.1	0.000123697
		2618.13	0.000141976
		2617.17	0.000150505
		2616.2	0.000148846
		2615.24	0.000157797
		2614.27	0.000168948
		2613.31	0.000164757
		2612.35	0.000141815
		2611.38	0.000114951
		2610.42	8.84527e-05
		2609.45	7.48476e-05
		2608.49	8.13253e-05
		2607.52	8.14728e-05
		2606.56	7.56101e-05
		2605.6	8.43199e-05
		2604.63	9.46179e-05
		2603.67	9.005e-05
		2602.7	8.35497e-05
		2601.74	9.4592e-05
		2600.77	0.000114382
		2599.81	0.00011571
		2598.85	9.83899e-05
		2597.88	8.63356e-05
		2596.92	9.24501e-05
		2595.95	0.000114681
		2594.99	0.000137534
		2594.02	0.000153065
		2593.06	0.000173413
		2592.1	0.000188234
		2591.13	0.000169389
		2590.17	0.000134667
		2589.2	0.000122401
		2588.24	0.000126261
		2587.27	0.000144443
		2586.31	0.000180502
		2585.35	0.000190766
		2584.38	0.000164076
		2583.42	0.000147575
		2582.45	0.000155417
		2581.49	0.000152519
		2580.52	0.000119435
		2579.56	8.52734e-05
		2578.59	6.76044e-05
		2577.63	5.99126e-05
		2576.67	7.64294e-05
		2575.7	0.000104386
		2574.74	0.000108773
		2573.77	0.000112751
		2572.81	0.000139338
		2571.84	0.000150605
		2570.88	0.00013536
		2569.92	0.000132057
		2568.95	0.000151568
		2567.99	0.000164436
		2567.02	0.000164956
		2566.06	0.000182022
		2565.09	0.000201855
		2564.13	0.000191591
		2563.17	0.000167819
		2562.2	0.000149279
		2561.24	0.000130914
		2560.27	0.000116571
		2559.31	0.000111637
		2558.34	0.000114105
		2557.38	0.000117696
		2556.42	0.000118121
		2555.45	0.000127553
		2554.49	0.000168019
		2553.52	0.000226588
		2552.56	0.000255061
		2551.59	0.000241897
		2550.63	0.000215224
		2549.67	0.000181066
		2548.7	0.000146858
		2547.74	0.000146295
		2546.77	0.000180085
		2545.81	0.000199605
		2544.84	0.000180877
		2543.88	0.000146209
		2542.92	0.000111703
		2541.95	8.5523e-05
		2540.99	8.03316e-05
		2540.02	9.29421e-05
		2539.06	0.000110356
		2538.09	0.00011635
		2537.13	0.000115689
		2536.16	0.000134157
		2535.2	0.000166605
		2534.24	0.000188959
		2533.27	0.000198667
		2532.31	0.000206393
		2531.34	0.00020567
		2530.38	0.000199339
		2529.41	0.00019864
		2528.45	0.000175068
		2527.49	0.000125192
		2526.52	7.74097e-05
		2525.56	3.95842e-05
		2524.59	3.93437e-05
		2523.63	8.68629e-05
		2522.66	0.000142045
		2521.7	0.000179398
		2520.74	0.00019978
		2519.77	0.000193925
		2518.81	0.00016046
		2517.84	0.00012298
		2516.88	0.000104376
		2515.91	0.000114031
		2514.95	0.000135802
		2513.99	0.000148067
		2513.02	0.000136899
		2512.06	0.000100441
		2511.09	8.99789e-05
		2510.13	0.000123264
		2509.16	0.000141108
		2508.2	0.000132295
		2507.24	0.00012997
		2506.27	0.000126166
		2505.31	0.000107024
		2504.34	0.000100092
		2503.38	0.00012324
		2502.41	0.000147301
		2501.45	0.000147701
		2500.49	0.000142227
		2499.52	0.000153386
		2498.56	0.00017201
		2497.59	0.000177901
		2496.63	0.000173491
		2495.66	0.000176517
		2494.7	0.000181246
		2493.73	0.000172333
		2492.77	0.000160234
		2491.81	0.000151963
		2490.84	0.000134759
		2489.88	0.000113317
		2488.91	0.000113518
		2487.95	0.000137921
		2486.98	0.000158538
		2486.02	0.00015933
		2485.06	0.00014163
		2484.09	0.000120874
		2483.13	0.000113875
		2482.16	0.000111901
		2481.2	0.000109043
		2480.23	0.000112432
		2479.27	0.000130201
		2478.31	0.000166872
		2477.34	0.000186697
		2476.38	0.000149989
		2475.41	0.000103516
		2474.45	0.000107679
		2473.48	0.000136001
		2472.52	0.000156605
		2471.56	0.000166455
		2470.59	0.000142245
		2469.63	9.24713e-05
		2468.66	6.7413e-05
		2467.7	6.3294e-05
		2466.73	4.55262e-05
		2465.77	2.96287e-05
		2464.81	3.35216e-05
		2463.84	4.08765e-05
		2462.88	4.84892e-05
		2461.91	7.19589e-05
		2460.95	0.00010179
		2459.98	0.000100017
		2459.02	7.65296e-05
		2458.06	8.53273e-05
		2457.09	0.000108906
		2456.13	9.33967e-05
		2455.16	5.83493e-05
		2454.2	4.47769e-05
		2453.23	5.4653e-05
		2452.27	7.02493e-05
		2451.3	7.32974e-05
		2450.34	6.01773e-05
		2449.38	4.33025e-05
		2448.41	4.67236e-05
		2447.45	7.06886e-05
		2446.48	9.60032e-05
		2445.52	0.00011348
		2444.55	0.000107701
		2443.59	8.54952e-05
		2442.63	7.29193e-05
		2441.66	6.20396e-05
		2440.7	4.51738e-05
		2439.73	4.24084e-05
		2438.77	6.51519e-05
		2437.8	9.21514e-05
		2436.84	9.26642e-05
		2435.88	8.42944e-05
		2434.91	0.000100355
		2433.95	0.000110105
		2432.98	8.0389e-05
		2432.02	3.94648e-05
		2431.05	2.19319e-05
		2430.09	2.22493e-05
		2429.13	1.40086e-05
		2428.16	6.3983e-06
		2427.2	1.73301e-05
		2426.23	2.91633e-05
		2425.27	3.48035e-05
		2424.3	4.35302e-05
		2423.34	5.56456e-05
		2422.38	6.05961e-05
		2421.41	4.62627e-05
		2420.45	2.88188e-05
		2419.48	3.94653e-05
		2418.52	7.01569e-05
		2417.55	8.15827e-05
		2416.59	6.20849e-05
		2415.63	3.40314e-05
		2414.66	2.73118e-05
		2413.7	5.79812e-05
		2412.73	9.14983e-05
		2411.77	8.55518e-05
		2410.8	5.88507e-05
		2409.84	4.26169e-05
		2408.87	4.03821e-05
		2407.91	4.3586e-05
		2406.95	3.29289e-05
		2405.98	1.08091e-05
		2405.02	5.7806e-06
		2404.05	2.85477e-05
		2403.09	6.16218e-05
		2402.12	7.07787e-05
		2401.16	6.65537e-05
		2400.2	9.06685e-05
		2399.23	0.000138202
		2398.27	0.000173783
		2397.3	0.0001616
		2396.34	0.000100211
		2395.37	4.51676e-05
		2394.41	3.54508e-05
		2393.45	5.02204e-05
		2392.48	5.56484e-05
		2391.52	4.05496e-05
		2390.55	1.62023e-05
		2389.59	6.7887e-06
		2388.62	1.07348e-05
		2387.66	9.3193e-06
		2386.7	8.0484e-06
		2385.73	2.04726e-05
		2384.77	3.85929e-05
		2383.8	3.59934e-05
		2382.84	1.39572e-05
		2381.87	1.76803e-05
		2380.91	6.33754e-05
		2379.95	0.000104098
		2378.98	9.41352e-05
		2378.02	5.04983e-05
		2377.05	1.89396e-05
		2376.09	1.93026e-05
		2375.12	4.16848e-05
		2374.16	5.00366e-05
		2373.2	2.96613e-05
		2372.23	1.28731e-05
		2371.27	8.675e-07
		2370.3	-3.50681e-05
		2369.34	-7.6867e-05
		2368.37	-9.27851e-05
		2367.41	-7.98097e-05
		2366.44	-4.81369e-05
		2365.48	-1.14739e-05
		2364.52	2.08701e-05
		2363.55	4.33547e-05
		2362.59	6.09643e-05
		2361.62	6.97993e-05
		2360.66	5.56628e-05
		2359.69	3.77861e-05
		2358.73	2.97746e-05
		2357.77	1.03952e-05
		2356.8	-1.60015e-05
		2355.84	-2.18111e-05
		2354.87	-1.9211e-06
		2353.91	3.02351e-05
		2352.94	5.97533e-05
		2351.98	6.25062e-05
		2351.02	3.30669e-05
		2350.05	1.70237e-05
		2349.09	5.61171e-05
		2348.12	0.000126944
		2347.16	0.00018236
		2346.19	0.000208956
		2345.23	0.000238247
		2344.27	0.00031258
		2343.3	0.000438456
		2342.34	0.000597892
		2341.37	0.000747721
		2340.41	0.000830369
		2339.44	0.000830611
		2338.48	0.000762858
		2337.52	0.000648609
		2336.55	0.000519186
		2335.59	0.00039051
		2334.62	0.000268725
		2333.66	0.000171113
		2332.69	0.0001097
		2331.73	7.57103e-05
		2330.77	5.14674e-05
		2329.8	2.65365e-05
		2328.84	4.6382e-06
		2327.87	-8.9287e-06
		2326.91	-1.33848e-05
		2325.94	-4.8647e-06
		2324.98	1.37805e-05
		2324.01	2.86839e-05
		2323.05	1.89858e-05
		2322.09	-3.11688e-05
		2321.12	-0.00010008
		2320.16	-0.000131785
		2319.19	-0.000123079
		2318.23	-0.000123504
		2317.26	-0.000129136
		2316.3	-0.000112679
		2315.34	-9.47512e-05
		2314.37	-8.5942e-05
		2313.41	-7.57401e-05
		2312.44	-6.80854e-05
		2311.48	-7.36052e-05
		2310.51	-0.00010164
		2309.55	-0.000144019
		2308.59	-0.000165801
		2307.62	-0.000154772
		2306.66	-0.000149031
		2305.69	-0.000166945
		2304.73	-0.000189956
		2303.76	-0.000207349
		2302.8	-0.000198826
		2301.84	-0.000155376
		2300.87	-0.000125813
		2299.91	-0.000143826
		2298.94	-0.000168334
		2297.98	-0.000173349
		2297.01	-0.000175333
		2296.05	-0.000170909
		2295.09	-0.000149212
		2294.12	-0.000109872
		2293.16	-6.91093e-05
		2292.19	-5.61648e-05
		2291.23	-7.32074e-05
		2290.26	-0.000106672
		2289.3	-0.000159685
		2288.34	-0.000218103
		2287.37	-0.000242305
		2286.41	-0.000234125
		2285.44	-0.000226333
		2284.48	-0.000206248
		2283.51	-0.000168988
		2282.55	-0.000155812
		2281.58	-0.00017722
		2280.62	-0.000206604
		2279.66	-0.00020141
		2278.69	-0.000146708
		2277.73	-0.000113092
		2276.76	-0.000149037
		2275.8	-0.000186043
		2274.83	-0.000166729
		2273.87	-0.000143093
		2272.91	-0.00016536
		2271.94	-0.000204619
		2270.98	-0.000217719
		2270.01	-0.000203071
		2269.05	-0.000185111
		2268.08	-0.000174796
		2267.12	-0.000170567
		2266.16	-0.000170498
		2265.19	-0.000173973
		2264.23	-0.000185473
		2263.26	-0.000197382
		2262.3	-0.000203505
		2261.33	-0.00020946
		2260.37	-0.000213778
		2259.41	-0.000218373
		2258.44	-0.000234906
		2257.48	-0.000251744
		2256.51	-0.000245574
		2255.55	-0.000238131
		2254.58	-0.000255632
		2253.62	-0.000262648
		2252.66	-0.000235477
		2251.69	-0.000218796
		2250.73	-0.000238668
		2249.76	-0.00025658
		2248.8	-0.000257477
		2247.83	-0.000265141
		2246.87	-0.000261781
		2245.91	-0.000228037
		2244.94	-0.000213907
		2243.98	-0.000260594
		2243.01	-0.000313465
		2242.05	-0.000307829
		2241.08	-0.000281562
		2240.12	-0.000289441
		2239.15	-0.000308039
		2238.19	-0.000299067
		2237.23	-0.000281917
		2236.26	-0.000283858
		2235.3	-0.000283133
		2234.33	-0.000262103
		2233.37	-0.000238436
		2232.4	-0.000238992
		2231.44	-0.000270825
		2230.48	-0.000306938
		2229.51	-0.000310201
		2228.55	-0.000276356
		2227.58	-0.000245896
		2226.62	-0.000246453
		2225.65	-0.0002513
		2224.69	-0.000245423
		2223.73	-0.000245032
		2222.76	-0.0002436
		2221.8	-0.000239858
		2220.83	-0.000251958
		2219.87	-0.000257943
		2218.9	-0.000245288
		2217.94	-0.000252855
		2216.98	-0.000281036
		2216.01	-0.000274075
		2215.05	-0.000237161
		2214.08	-0.000240639
		2213.12	-0.000285778
		2212.15	-0.000323545
		2211.19	-0.000334694
		2210.23	-0.000307721
		2209.26	-0.000268434
		2208.3	-0.000257405
		2207.33	-0.0002625
		2206.37	-0.000272979
		2205.4	-0.000282184
		2204.44	-0.000262527
		2203.48	-0.000230455
		2202.51	-0.00023755
		2201.55	-0.000290035
		2200.58	-0.000340037
		2199.62	-0.000355771
		2198.65	-0.000356667
		2197.69	-0.000349926
		2196.72	-0.000323957
		2195.76	-0.000305749
		2194.8	-0.000321023
		2193.83	-0.000348349
		2192.87	-0.000350162
		2191.9	-0.000327434
		2190.94	-0.000321151
		2189.97	-0.000342253
		2189.01	-0.000362792
		2188.05	-0.000347433
		2187.08	-0.000296954
		2186.12	-0.000264376
		2185.15	-0.000274629
		2184.19	-0.000301761
		2183.22	-0.000322161
		2182.26	-0.000345972
		2181.3	-0.000374593
		2180.33	-0.000364775
		2179.37	-0.000317562
		2178.4	-0.000282816
		2177.44	-0.00027553
		2176.47	-0.000287727
		2175.51	-0.000323281
		2174.55	-0.000369533
		2173.58	-0.000379155
		2172.62	-0.00034909
		2171.65	-0.000333845
		2170.69	-0.000338449
		2169.72	-0.00033975
		2168.76	-0.000348714
		2167.8	-0.000360585
		2166.83	-0.000352799
		2165.87	-0.000339171
		2164.9	-0.000341125
		2163.94	-0.000354408
		2162.97	-0.00037908
		2162.01	-0.000401623
		2161.05	-0.000393831
		2160.08	-0.000376721
		2159.12	-0.000375918
		2158.15	-0.000368789
		2157.19	-0.000357727
		2156.22	-0.000362567
		2155.26	-0.000367164
		2154.29	-0.000367079
		2153.33	-0.000381208
		2152.37	-0.000398622
		2151.4	-0.000390282
		2150.44	-0.000366253
		2149.47	-0.000352052
		2148.51	-0.000344396
		2147.54	-0.000337241
		2146.58	-0.000339675
		2145.62	-0.000365343
		2144.65	-0.000409801
		2143.69	-0.000431228
		2142.72	-0.000405363
		2141.76	-0.000376012
		2140.79	-0.000382189
		2139.83	-0.000405382
		2138.87	-0.00042135
		2137.9	-0.000433963
		2136.94	-0.000457364
		2135.97	-0.000491485
		2135.01	-0.000505715
		2134.04	-0.000479093
		2133.08	-0.000428751
		2132.12	-0.000390339
		2131.15	-0.000397758
		2130.19	-0.000446256
		2129.22	-0.000478744
		2128.26	-0.000453554
		2127.29	-0.000413791
		2126.33	-0.000423906
		2125.37	-0.000458771
		2124.4	-0.000452714
		2123.44	-0.000426259
		2122.47	-0.000437187
		2121.51	-0.000466859
		2120.54	-0.000475709
		2119.58	-0.000477221
		2118.62	-0.000492422
		2117.65	-0.000514172
		2116.69	-0.000513888
		2115.72	-0.000484119
		2114.76	-0.000449897
		2113.79	-0.000417568
		2112.83	-0.000400715
		2111.86	-0.00042038
		2110.9	-0.000448858
		2109.94	-0.000473555
		2108.97	-0.000506999
		2108.01	-0.000525076
		2107.04	-0.000522035
		2106.08	-0.000524805
		2105.11	-0.000534432
		2104.15	-0.000545525
		2103.19	-0.000561594
		2102.22	-0.000569729
		2101.26	-0.000550783
		2100.29	-0.000509659
		2099.33	-0.000482752
		2098.36	-0.000488833
		2097.4	-0.000507611
		2096.44	-0.000533509
		2095.47	-0.000579618
		2094.51	-0.00066172
		2093.54	-0.000820223
		2092.58	-0.00111
		2091.61	-0.00157
		2090.65	-0.00214
		2089.69	-0.00268
		2088.72	-0.00304
		2087.76	-0.00309
		2086.79	-0.0028
		2085.83	-0.00228
		2084.86	-0.00169
		2083.9	-0.00112
		2082.94	-0.000664132
		2081.97	-0.000375392
		2081.01	-0.000325584
		2080.04	-0.000585296
		2079.08	-0.00109
		2078.11	-0.0016
		2077.15	-0.00177
		2076.19	-0.00137
		2075.22	-0.000542026
		2074.26	0.000148181
		2073.29	0.000167742
		2072.33	-0.000436314
[truncated: 905 more rows]
