# Supplementary material for: Secondary structure changes as the potential H2 sensing mechanism of group D [FeFe]-hydrogenases
Source: Royal Society of Chemistry journal article supplement (doi:10.1039/d4cc03098b), 2024-01-01
Supplement: d4cc03098b2.pdf [file d4cc03098b2.pdf]

## Supporting Information

### Secondary structure changes as the potential H<sub>2</sub> sensing mechanism of Group D [FeFe]-hydrogenases

Ivan Voloshyn<sup>a</sup>, Conrad Schumann<sup>b</sup>, Princess R. Cabotaje<sup>b</sup>, Afridi Zamader<sup>b,†</sup>, Henrik Land<sup>b</sup> and Moritz Senger<sup>a,b\*</sup>

a) Department of Chemistry – BMC, Biochemistry, Uppsala University, 75120 Uppsala, Sweden

b) Department of Chemistry – Ångström Laboratory, Molecular Biomimetics, Uppsala University, 75120 Uppsala, Sweden

<sup>†</sup>) Current address: Laboratoire d'Electrochimie Moléculaire (LEM), Université Paris Cité, CNRS, F-75006, Paris, France.

\*To whom correspondence should be addressed

[moritz.senger@kemi.uu.se](mailto:moritz.senger@kemi.uu.se)

### Contents

|                                                                                                                                             |    |
|---------------------------------------------------------------------------------------------------------------------------------------------|----|
| Materials and Methods .....                                                                                                                 | 2  |
| In silico genomic analysis of region .....                                                                                                  | 2  |
| Attenuated Total Reflectance Fourier-Transform Infrared (ATR-FTIR) spectroscopy .....                                                       | 2  |
| Enzyme purification.....                                                                                                                    | 2  |
| Synthetic chemistry .....                                                                                                                   | 3  |
| Table S1-3: Promoters, terminators and ribosome binding sites.....                                                                          | 4  |
| Table S4 Infrared band patterns of different redox states in <i>TamHydS</i> (Group D) and <i>CrHydA1</i> (Group A) [FeFe]-hydrogenase ..... | 5  |
| Figure S1: Redox state specific band population over the time course of the photo-reduction experiment .....                                | 6  |
| Figure S2: ATR-FTIR Hred-Hox difference spectra of <i>TamHydS</i> (Group D) and <i>CrHydA1</i> (Group A) [FeFe]-hydrogenases .....          | 8  |
| Figure S3: H/D effect on the ATR-FTIR Hred-Hox difference spectra of <i>TamHydS</i> .....                                                   | 10 |
| Fit parameters Fig.S1.....                                                                                                                  | 11 |
| Annotated <i>Thermoanaerobacter mathranii</i> genome.....                                                                                   | 12 |
| Supporting References .....                                                                                                                 | 17 |

## Materials and Methods

### In silico genomic analysis of region

The genomic region containing *TamHydS* and a gene encoding Group A [FeFe]-hydrogenase was analysed for operon structure, promoters, terminators, as well as ribosome binding sites (RBS). To determine bacterial operons, an **Operon-Mapper** prediction tool was used.<sup>1</sup> For the prediction of putative promoters and terminators, tools **BPROM** and **FindTerm** were used.<sup>2</sup> For ribosome binding site prediction, the **RBS Calculator** from DeNovoDNA was used ([https://salislab.net/software/predict\\_rbs\\_calculator](https://salislab.net/software/predict_rbs_calculator)).

The results of each prediction were manually aligned with the genome sequence to choose the best suitable options among predicted.

### Attenuated Total Reflectance Fourier-Transform Infrared (ATR-FTIR) spectroscopy

A solution of 2  $\mu$ L enzyme (0.375–1 mM *TamHydS*) in 10 mM Tris buffer (pH 8.0), 3  $\mu$ L Eosin Y (6mM) and 0.5 $\mu$ L 100 mM Ethylenediaminetetraacetic acid (EDTA) was deposited on the ATR crystal in the anaerobic atmosphere of a Braun Glove box. The ATR unit (BioRadII from Harrick) was sealed with a custom-built PEEK cell that allowed for gas exchange and illumination (similar to Stripp 2021<sup>3</sup> and Senger et al., 2016<sup>4</sup>) mounted in a FTIR spectrometer (Vertex V70v, Bruker). Illumination for photo-reduction experiments was facilitated via a Schott KL2500 lamp optically coupled to the ATR crystal surface with fibre optics. The sample was dried under 100% nitrogen gas and rehydrated with a humidified aerosol (100 mM Tris-HCl, pH 8) as described before.<sup>5</sup> For H<sub>2</sub> exposure experiments, a mixed buffer (pH 8, 50mM Tris-HCl, 50 mM Citric acid) was used. Spectra were recorded with 2 cm<sup>-1</sup> resolution, a scanner velocity of 80 Hz and averaged of varying number of scans (mostly 1000 Scans). All measurements were performed at ambient conditions (room temperature and pressure, hydrated enzyme films). Gases (N<sub>2</sub>, H<sub>2</sub>) were applied at a flow rate of 0.5-1.5 L/min. The data was analysed and plotted to our protocols described previously.<sup>6,7</sup>

### Enzyme purification

#### Preparation of *TamHydS*<sup>ADT</sup>

The preparation of *TamHydS*<sup>ADT</sup> was performed as previously reported with minor changes to the procedure.<sup>8</sup> For the expression of the apo-form, sequence-confirmed plasmids were transformed in chemically competent *E. coli* BL21(DE3) cells. The protein expression was induced at O.D.<sub>600</sub>  $\approx$  0.5 with 1 mM IPTG with concomitant supplementation of the culture with 100  $\mu$ M FeSO<sub>4</sub> in 1% HCl solution. The harvested cell pellets were lysed by 3 cycles of freezing/thawing in liquid N<sub>2</sub> in 100 mM Tris-HCl, 150 mM NaCl pH 8.0 supplemented with 1 g/L lysozyme, 0.05 g/L DNase, 0.05 g/L RNase, 2 g/L MgCl<sub>2</sub> \* 6 H<sub>2</sub>O and cComplete™ Protease Inhibitor Cocktail (Roche). The cell lysis, protein purification, the reconstitution of the [4Fe-4S] clusters, as well as the activation of the enzyme were carried out in an MBRAUN glovebox under argon atmosphere (app. 1 ppm O<sub>2</sub>). The protein was purified using StrepTrap affinity chromatography (StrepTrap XT (GE Healthcare)) following the manufacturer's instructions and applying an additional washing step with 1 M urea in 100 mM Tris-HCl, 150 mM NaCl pH 8.0. After purification, the protein yield was 2.8 mg L<sup>-1</sup> of cell culture with an iron/protein content of 11.8 Fe/protein. By incubating the enzyme (50  $\mu$ M) in a reaction with 500  $\mu$ M dithiothreitol, 500 nM cysteine desulfurase (*E. coli* IscS), 525  $\mu$ M L-cysteine and 525  $\mu$ M (NH<sub>4</sub>)<sub>2</sub>Fe(SO<sub>4</sub>)<sub>2</sub>(H<sub>2</sub>O)<sub>6</sub> in 100 mM Tris-HCl, 150 mM NaCl pH 8.0 all [4Fe-4S] clusters were fully reconstituted (17.0  $\pm$  1.4 Fe/protein). Subsequently, the yielded apo-form of *TamHydS* (200  $\mu$ M) was semi-artificially activated by incubating it for 30 min with 4 mM sodium dithionite and 2.4 mM of [2Fe]<sup>ADT</sup> in 100 mM Tris-HCl, 150 mM NaCl pH 8.0. Eventually the activation reaction was desalted using 10 mM Tris-HCl pH 8.0 containing 5 mM NaDT. The generated holo-form of [2Fe]<sup>ADT</sup>-activated *TamHydS* aliquots were concentrated to 2.0 mM.

Aliquots were prepared in air-tight vials, flash-frozen in liquid N<sub>2</sub> and stored at -80 °C. The successful activation and the correct cofactor integration were verified by ATR-FTIR analyses.

The expression and purification procedures were further optimized for improved yields and protein purity. For the cell lysis, the above described lysis buffer was supplemented with 5 g/L sodium deoxycholate and 50 g/L Sucrose. Additionally, the freeze-thaw-cycles were replaced by sonication. During the purification an additional washing step with 5 mM ATP and 10 mM MgCl<sub>2</sub> in 100 mM Tris-HCl, 150 mM NaCl pH 8.0 was applied to remove contaminant Hsp70 molecular chaperones which replaced the 1M urea washing step.<sup>9, 10</sup> The generated holo-form of [2Fe]<sup>ADT</sup>-activated *TamHydS* was concentrated to 375 μM. As before, aliquots were prepared in air-tight vials, flash-frozen in liquid N<sub>2</sub> and stored at -80 °C. The successful activation and the correct cofactor integration were verified by ATR-FTIR spectroscopic analysis.

#### Synthetic chemistry

The synthesis of (Et<sub>4</sub>N)<sub>2</sub>[Fe<sub>2</sub>(μ-ADT)(CO)<sub>4</sub>(CN)<sub>2</sub>]<sup>11</sup> was performed using previously reported protocols, and purity verified using a combination of FTIR, NMR and UV/Vis spectroscopy.

Table S1-3: Promoters, terminators and ribosome binding sites.

The output from prediction tools was manually aligned with the genomic sequence to annotate the region surrounding *TamHydS*. The promoter and terminator results with the highest scores are provided in the Table S1 and S2, respectively. Ribosome binding sites are listed in Table S3.

**Table S1 Promoters:**

| Name       | Position        | -35 sequence | -10 sequence | LDF score <sup>1</sup> |
|------------|-----------------|--------------|--------------|------------------------|
| Promoter 1 | 900768 - 900789 | TTTAAA       | TAGTATAAT    | 7.34                   |
| Promoter 2 | 904809 - 904840 | TTGTTA       | TGATATAAT    | 10.46                  |

<sup>1</sup>Linear discriminant function (LDF) score provides a measurement of promoter strength.

**Table S2 Terminators:**

| Name         | Chain | Length (nt) | Sequence                                                                                                                      | Score |
|--------------|-------|-------------|-------------------------------------------------------------------------------------------------------------------------------|-------|
| Terminator 1 | +     | 35          | uccuugcccaaccccuucacccuuucaaaGUAACCUCA<br>caucaaacucucuuuuuaaaau                                                              | -14.5 |
| Terminator 2 | +     | 50          | Uucuauucgaacaagucuuaccgcuucaggauuaucuccuau<br>gcaauaguuuucuccaaucaauaucgcuuAUGCCAGAAc<br>ugcuacaauaucuccuaaacuugcuuucucuacuug | -21.9 |

**Table S3 Ribosome binding site:**

| Ribosome binding site number | Position | Sequence |
|------------------------------|----------|----------|
| 859                          | 900797   | UAAAGG   |
| 860                          | 901604   | GUUAGG   |
| 862                          | 902382   | AGUAGG   |
| 863                          | 903695   | AGGAGU   |
| 865                          | 904903   | AGGAGG   |
| 868                          | 906326   | AGGAGG   |
| 869                          | 908141   | AGGAGU   |

Table S4 Infrared band patterns of different redox states in *TamHydS* (Group D) and *CrHydA1* (Group A) [FeFe]-hydrogenase

|                        | <i>TamHydS</i> (Group D) bands in cm <sup>-1</sup>                                     | <i>CrHydA1</i> (Group A) bands in cm <sup>-1</sup>                                                |
|------------------------|----------------------------------------------------------------------------------------|---------------------------------------------------------------------------------------------------|
| Hox                    | 2082, 2074, 1970, 1948, 1787 <sup>8</sup>                                              | 2088, 2072, 1964, 1940, 1800 <sup>12</sup>                                                        |
| Hred (H <sub>2</sub> ) | 2062, 2030, 1961, 1922, 1895 <sup>8</sup><br>2063, 2032, 1922, 1996, 1801 (this study) | 2072, 2033, 1961, 1915, 1891 <sup>13</sup><br>At 90 K, n.d., n.d., 1919, 1891, 1817 <sup>14</sup> |
| Hred (photo-reduction) | 2063, 2032, 1922, 1895, 1803 (this study)                                              | 2072, 2033, 1961, 1915, 1891 <sup>15</sup>                                                        |

Bands are indicated in the order CN, CN, tCO, tCO,  $\mu$ /tCO

Figure S1: Redox state specific band population over the time course of the photo-reduction experiment

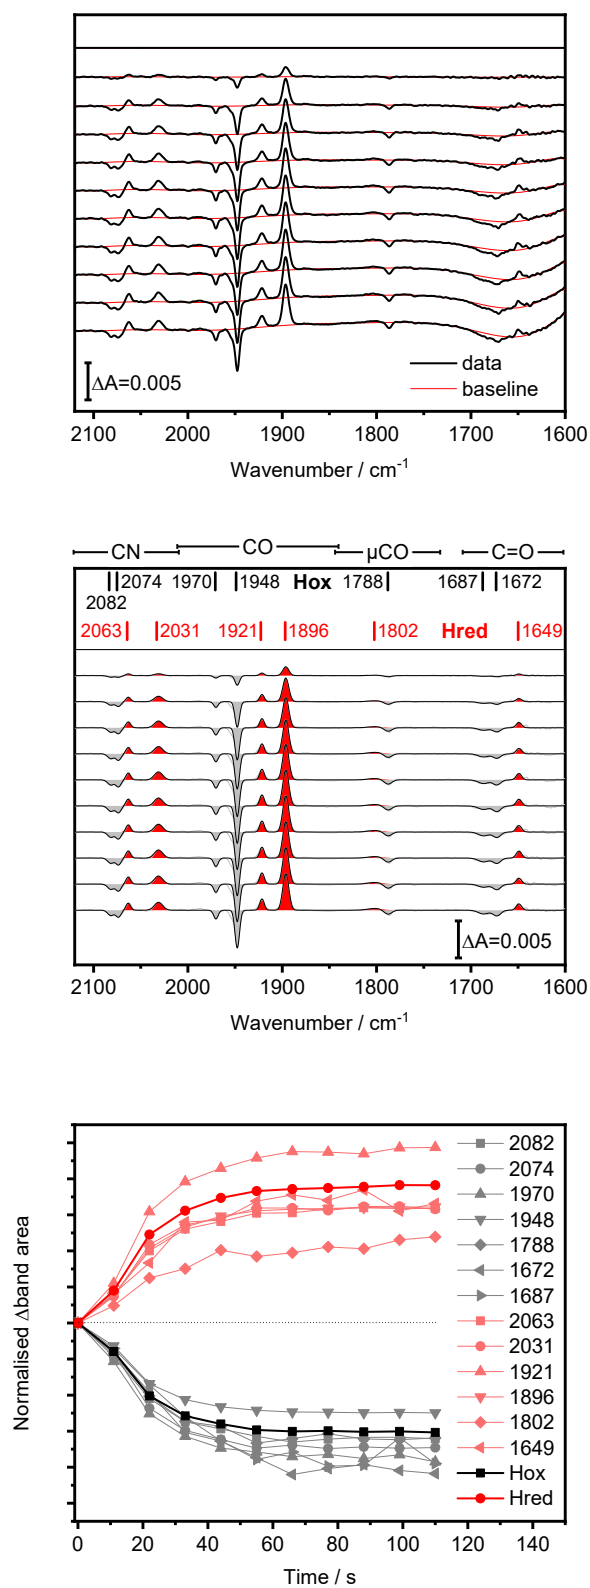

**Figure S1:** (top) Visualization of the baseline subtraction process. Data in black, Baseline in red. (middle) Baseline subtracted difference spectra with redox state specific bands highlighted (bottom) Plotting the band area of redox specific peaks over time highlights the co-population of bands associated with one redox state. Note that band areas are normalized to allow for better visual comparison.

Figure S2: ATR-FTIR Hred-Hox difference spectra of *TamHydS* (Group D) and CrHydA1 (Group A) [FeFe]-hydrogenases

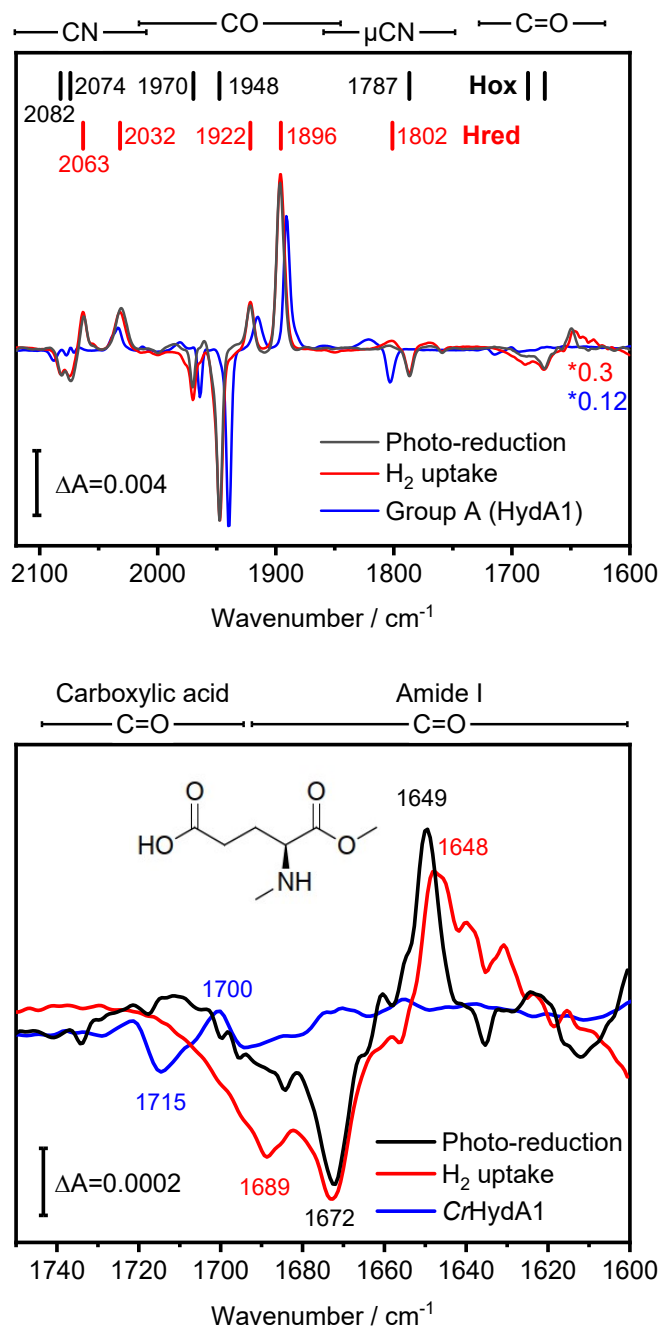

**Figure S2:** (top) Upon exposure of *TamHydS* to either H<sub>2</sub> (red spectrum) or illumination of *TamHydS* in the presence of Eosin Y and EDTA as sacrificial electron donor (black spectrum, photo-reduction) we observe the population of the reduced state Hred (Positive peaks: 2063, 2032, 1922, 1896, 1802 cm<sup>-1</sup>) and a de-population of Hox (negative peaks: 2082, 2074, 1970, 1948, 1787 cm<sup>-1</sup>). The same transition from Hox to Hred was observed in CrHydA1 (blue spectrum) induced by the photoreduction protocol (peak positions are shifted due to the different [FeFe]-hydrogenase). The respective vibrational regions are indicated above the graph. Band positions are indicated by coloured bars.



(bottom) Zoom in on the C=O region. We observe a large difference feature in the Amide I C=O region with a positive peak at 1649 cm<sup>-1</sup> and a negative peak at 1672 cm<sup>-1</sup> in the Hred-Hox difference spectrum of TamHydS induced via photo-reduction (black) or induced by H<sub>2</sub> exposure (red) which we assign to a change in secondary structure. In the Group A [FeFe]-hydrogenase CrHydA1 (blue spectrum) no changes in the Amide I region are detected in the difference spectrum of the Hox to Hred transition. Instead we detected a difference feature in the carboxylic acid C=O region (1715 and 1700 cm<sup>-1</sup>) which indicates a rearrangement of the hydrogen bonding network of the PTP absent in TamHydS. The respective vibrational regions are indicated above the graph.

The H<sub>2</sub> uptake spectrum of *TamHydS* is scaled by 0.3 and the photoreduction spectrum of *CrHydA1* by a factor of 0.12 for better comparability. *CrHydA1* data modified from ref<sup>15</sup>.

Figure S3: H/D effect on the ATR-FTIR Hred-Hox difference spectra of *TamHydS*

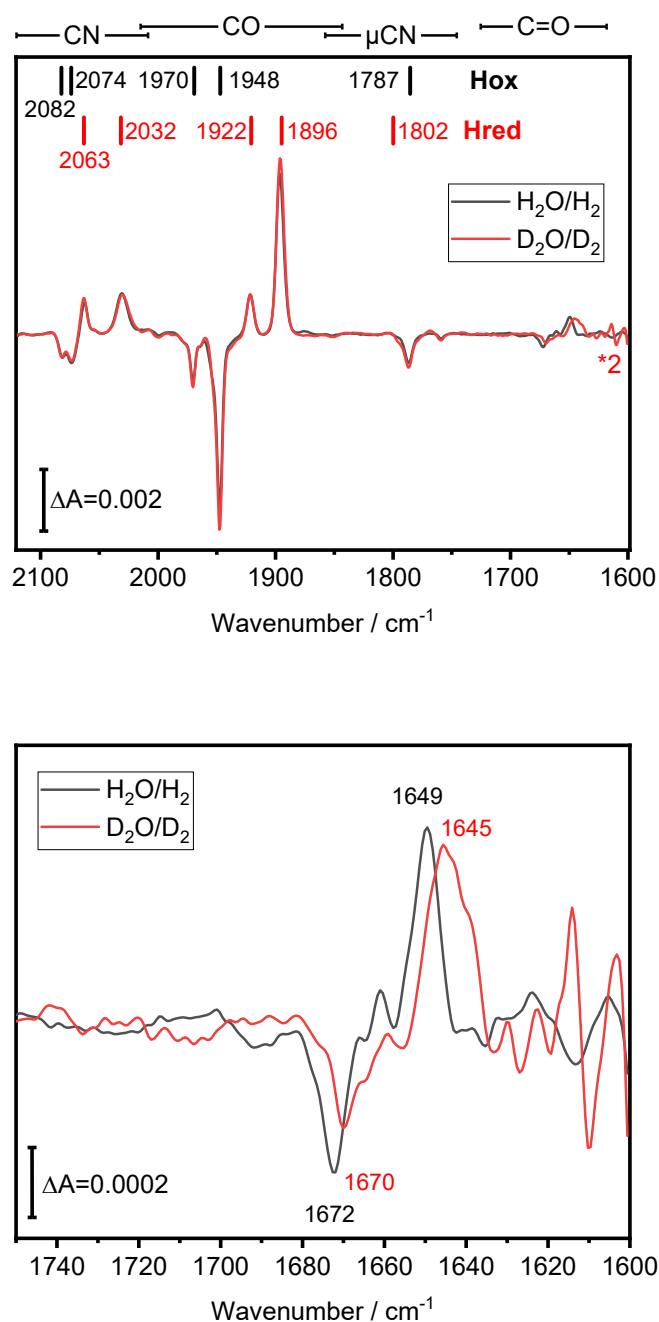

**Figure S3:** (top) The transition from Hox (negative bands) to Hred (positive bands) was induced either in H<sub>2</sub>O via H<sub>2</sub> (black spectrum) or in D<sub>2</sub>O via D<sub>2</sub> (red spectrum). The difference spectra look overall similar but exhibit slight differences in the C=O (Amide I) region. (Bottom) Zoom in on the C=O (Amide I) region for the transition shown in the top. We detected a down-shift of the negative band at 1672 to 1670 cm<sup>-1</sup> and of the positive band at 1649 to 1645 cm<sup>-1</sup> upon deuteration. The D<sub>2</sub>O/D<sub>2</sub> spectrum is scaled by a factor of two to allow for better visual comparison.

## Fit parameters Fig.S1

Fit parameters used to analyse and plot the data as described before.<sup>6, 7</sup> In short band position and band width (Full Width Half Max (FWHM)) for each redox state are fitted to sets of spectra. In some cases, the relative amplitudes of the peaks related to one redox state are derived from the fit.

### TamHydS<sup>ADT</sup> Fig.S1

| <b>Band position</b> | <b>FWHM</b> | <b>Redox state</b> |      |
|----------------------|-------------|--------------------|------|
| 2081,73277048695     | -           | 7,81297001312315   | Hox  |
| 2073,57909496923     | -           | 6,51261389374464   | Hox  |
| 1970,30216362434     | -           | 5,72919867410981   | Hox  |
| 1947,68473038479     | -           | 5,64983595248925   | Hox  |
| 1787,96633434964     | -           | 9,57488904726338   | Hox  |
| 2063,28761581669     | -           | 5,76870662850313   | Hred |
| 2031,19703921083     | -           | 10,4127838002636   | Hred |
| 1921,48715276992     | -           | 5,52050765083911   | Hred |
| 1896,23423787334     | -           | 7,53581753427441   | Hred |
| 1801,6632547387      | -           | 18                 | Hred |
| 1672,42617114634     | -           | 9,60741974551811   | Hox  |
| 1649,09320466939     | -           | 6,82534955653803   | Hred |
| 1686,55425474694     | -           | 13,1130249689038   | Hox  |

## Annotated *Thermoanaerobacter mathranii* genome

### *Thermoanaerobacter mathranii* genome at position 897,980 – 910,900

NCBI database: *Thermoanaerobacter mathranii* subsp. *mathranii* str. A3, complete genome  
(<https://www.ncbi.nlm.nih.gov/nuccore/CP002032.1?report=graph&from=902393&to=904300>)

Gene sequences marked-up with the starting codon underlined

ACCTTATGAAATTTGTAAGAGAAGATGTAAGAAATATAGCCATTATTGCTCATGTTGATCATGGAAA  
AACTACTTTGGTTGATGCTATGCTTAAACAAAGCGGTATTTTTAGGTCAAATGAAAAAGTTGAGGAA  
AGGATTTGGACTTAAACGATTTAGAAAGAGAGAGAGGAATAACGATTCTTGCAAAAAACTGCTA  
TACGATATAAAGATGTGAAAAATAATATAGTGGATACCCCAGGACATGCGGATTTTAGCGGTGAAGT  
AGAGCGAGTATTA AAAATGGTAGATGGGGTACTTTTCTGCTGGTGGATTCTTTCGAAGGACCTATGCCA  
CAGACCCGTTTTGTGTTAAGCAAAGCTTTGGAAGTACTTTAAACCTATAGTTGTTATAAATAAAAT  
TGATAGACCTGATGCAAGGCCAGAGGAGTTATTGACGAAGTCTTAGATTTATTTATTGAATTAGGA  
GCAAATGATGACCAAATCGATTTTCTGTGGTTTACACTTCTGCAAAGAAGGTATAGCAAATTA  
GCTTAGATGAAGAATCTCATGACTTGAGACCTCTTTTGTACGATTTTAGAGTATATTCCTGCTCCCT  
CAGGAAACATTGAAGCCCCCTGCAACTTATAGTACTTTAGATTATGATGATTACATTGGGAGA  
ATTGCCATTGAAAAATAGTTAGAGGGAAGATAATTTAGGAGAAGAAGCGGCCATATGTAAAAGA  
GACGGGTCGATACAAAAGTTCACATAAATAATTTATATCAGTTTGAAGGACTAAAAAGAGTGCAAG  
TAGAAGAAGCAAGTTTAGGAGATATTGTAGCAGTTTCTGGCATAAGCGATATTGAGATTGGAGAAA  
CTATTGCAGATAGGGATAATCCTGAAGCGGTAGACTTTGTTTGAATAGAAGAGCCTACAGTFACTAT  
GACTTTTAGTGTAATACCAGTCCTTTTGCAGGAACCGAAGGTAATACGTTACTTCAAGGCATTTAA  
GAGAAAGGCTTTTTAAGGAGTTAGAGACAAACGTAGCGTTGCGTGTGAAGAACTGATTCTCTGA  
TTCTTTAAAGTATCTGGAAGAGGAGAGTTACATCTTTCTATTTTAATTGAGACTATGAGGCGGGAAG  
GGTATGAATTGCAGGTTTCTAAGCCTACAGTAATTTTTAAAGAGGAAAATGGAGTAAAGATGGAACC  
TATTGAACTTTTGACAATAGATATCCCAGAAGAATATATGGGAGTTGTAATTGAAAAATTAGGGCCG  
AGAAAAGCTGAGTTGATGGATATGCACACATTGAAACCGGGGACTGTAAGGCTTAAGTTTAAATA  
CCTACAAGAGGCTTGATAGGGTATCGTTCTGAATTTTAAACAGATACCAAAGGAAATGGGATAATGA  
CTTCGGTATTTTATGATTATGAACCTTATAAAGGAGACATTCTTCTCGGGGAAGAGGCGCTCTTGTA  
GCTTTTGAGACAGGCGTTGCGACAACGTATGGGCTTACAACGCGCAAGAAAGAGGAACACTTTTAA  
TAGAGCCAGGTACAAAGGTATATGAAGGGATGGTTGTGGGGATTAATGCAAGAAGTGGAGATATT  
GATGTAATGTATGTAAGAAAAACATGTGACAAATTAAGGTCTGCGACGGCAGATGAGGCTTTG  
AGGCTATCACCTATAAAAAAGATGTCGTTAGAAGAAGCATTAGAATTTATAGACAATGATGAATTAG  
TTGAAGTTACTCCTCAAAGCATTAGAATACGAAAAAAGATTTTGGATTCTCAACAGAGGTATAAAAG  
TGCAAAATATAACAATAAAGGAGCTTTATGCATCCTTCAGCTTGTTGACAAAGTAAAAATTTTTTAA  
ATAGGATATTTTGCATCGTCACTCTGATGTTCCACAGCGCAAAACTAAGCTCCACCTTCGGGTTCCGGCA  
GGGTCACGGGCACATTGACCTCCTGTCTCAGGTGCCCGCTCCGCCATCCTTGCTTCGGCCCTGCCTC  
CGCCCTCGGTCTCGTAAGTTTTGTTAACGCTTTGTACAAGTTGTGCCTTATGCAAAATATCCTATTTC  
GAAAGTTTGTATACAGTCTAAAGGAGCTTGATGGCTCCTTCTATTTATATAATTCATTTAAAATTTTGCT  
TATATAATTTATAGTTTCTGGTAAGGGGAATACCTTGATATTTTCTACTGATTGAGGACCAGCATT  
ATATGCAGCTAATGCTAATCTTATGTCATGGTAAGTGTCTAGCAAATTTTTAGGTATCTTACTCCTCC  
ATCTATATTTGAGAAGGGTCAAAGGATTGGATACATTCAATTCCTTTCAGTCGAAGGCATAAGCT  
GCATAAGTCCATTGCTCCTGCAGGAGAACTGCGAAAGGATTA AAATTAGACTCTGCTTTGATAACT  
GCTCTAATAAGGTTTGCATCTATATTATTTTTGACTGGCCCGTTGTATTAATCTTCAATTTGTTGTA  
AATTTGATTTGTTGATGATGCATTGTTACTTACATTTCTGAATTGTATTGTTGATTTTCTATAGCATT  
CTTAAAACCTTCGGCAAAGGTTTATCTGTATTAATATTTTTACATTAGCAGGGAGTCTACTTTGAAT  
TTCTCTAAATTTATTTCAATTATTTGATTTACAATATTTATCAATCTACCCTCCCATCATATATAATTC

**857:**  
TypA GTP-  
binding protein

**858:**  
Lytic trans-  
glycosylase  
(here reverse  
complement of  
CDS with starting  
codon TTG)

GACAAAATTCCTCTAAAACCTCTTTTAAAAGTGTAATTAGTAAAAAAGTCCTATTAATTTTTAAAGG  
ATTTTTAAAGGAGTATAGTATAATATAAGTAAAGTTTATGGTAAGGGTTGATGAAGCAATGAAAA  
CGAAAGAATACTGGAAGTGTAATTGTTGTATTAATAATTCCTCTGGTGTCTCTTTTAGCAGGTTATTT  
GTTTCAAAGATATTATAGTGCCTAACATTTCAAAAACAAATGACAGCAATAATTTTAAAGAGATGGTT  
GTTAAAGGCGTAGACTGTTTGAATTATTTAGGCAGCTATTCAGATTTTGAGACTGCAAAATATCAA  
GAAGATTTAATGAGGATGAAAAGAGTTTACTCTTCGTTAGTAAATATTCTGATAAGTATTTGTTGATAG  
GTGGTATATTTTAGATAAAGAACAGGCTGCTTATTTTCTCCTCTTAAAGTCTCAAGGAATTTCCAGT  
GAAGTATATTTAAAAAGGGGACCTTCTCTCAGAATTAATATGATAAGAAATTAACATCAGATATGGAT  
GATTTTACAAGTAAATTACAAGATTTTAAACAAATTCCTGATTATATAGCTACTCTTCTTATAAGGCTTA  
TGATGACAAGTTAGAACGACAAGAATTGGAGGAATTA AAAAGGAAAAGTAGATAGTTTTAAAATGGA  
AATGGGGATTTTGAAAAAAGAAATGACTGCACTAGTACAAAAGACGACAGATATTGTCGATAAAAT  
AACAACGATATTGAAAAATTGAAATATCAGCTGCTTAGAAGATGGAAATACATTTAGTTTGTGCA  
AGAAAGTTTATGGCAATCTGTGAAGAATACAACGCTTTTTTGAAAACAATTGCTGTGCAGAATCAATG  
ATGGGGTGTAGGGTATGAGATTA AAAAGAGGTA AAAAGAAATTTAAATGCAGAAGTTATGATAGGAG  
AAGAAAAATTGGAAGAAGAAGTGTACTGCTTGTGGAGCGGACTTGATGAGTGATGTTTTGGCATCA  
CGTGACGAAAAGGCTGTGCTTTTGACAGGGCTTACTAATGTGCAGGTTATAAGGACTGCAGAAGTAGT  
TGGAGATATTAATGTATAGTATTTGTAAGAGGTAAGAATCCGGGAGAGGACATATTGGAACCTGCTA  
AAAAGGCAGGGCTAGTGATAATGAAAACGAAATATCCTCTTACATTGCTTGTGGCCTTTGTACTCCA  
**ATGGGCTTACTTGTA AAAAGTGGTGAAGGAAATGGTACTTTATAGTTTAGATTTTGATGTA AAAAGCAA**  
**GAGATTTGATTCTGCGGGAGAGGTTCCAGCAATTAAGGTCAGTATTA AACAGCTTTCCTTAAAT**  
**CCAGATGTTGTAAGGAGAAGTTGCATAGCTTGCTATGAAGCAGAGATGAATATAATAATTCATTCTT**  
**ATGGAGGTCACATGAAAATAGAGATTTTTGGCGATAAAAATACGCATAACTGCAGAAGACACAGGCC**  
**CTGGAATAGAAGACATTGAACTGCCATGAAAGAAGGATATTCTACTGCTCCTGAAGAGATAAGGG**  
**AAATGGGATTTGGAGCCGGCATGGGGCTTCTAATATGAAGGAGAATTCGGATTTTCATGGATATAAA**  
**AAGCAGTAAAGAGGGAACAACCTGTGGTGATGGAAATTTGTTAAGTAG**GTGATAAA**ATGTTATATT**  
**TTCACTCTGTAACATTAGATAAGGATAGATGTAGAGGGTGTACTAATTGCATAAAAAGATGTCCTAC**  
**AGAGGCAATAAGGGTAAGAGATGGGAAAGCAAGGATTATAAATGAAAGGTGTATAGATTGTGGTG**  
**AGTGTATACGTGTGTCCATATCATGCTAAATTGGCGGTAACCTGATAGTTTGGATATGATGAAAGA**  
**TTTCAAGTACAAGATTGCACTTCTGCTCCTTCTTATATGGACAATTTAGGGATTTAACTATTAATCA**  
**AATATTGAGTGCTTACTGGATGTGGGATTTGATGAGGTTTTGAAAGTAGCATATGCTGCTGAAATTG**  
**TTTCTAAATTTACGCGGAAGCATTAGCAAAAAGGGAATTTAAAAAAACCAGTTATATCTTCTGCTTGT**  
**CCTGCTGTTGTGCGACTCGTACAAATCAGATTTCCCTCTTGATTGATAATTTATTGGATATATGTTCTC**  
**CTATGGATACTGCGGCGATATTAGCAAAAAGGAAGCAATTA AAAAGACGGGACTGAAGGAAGAG**  
**GAAATAGGAGTTTTTTTCAATTTCTCCCTGTGCTGCAAAAGTGACAAGTGTGAAAAATCCTATTGGTAT**  
**AGAAAAATCCAAAATTGATGGGGTTTTTCTATGAAAGAAATATATGGCCTAATAATTCAAAAAGCT**  
**AAGACTACTGTTGTTAGAGATTTAAGCAAGGCTTCTATGATAGGTGTTGGCTGGGCAAACCTCTGGGG**  
**GAGAAGCTTTTGGTACTTTTACAGAAAATAGTATTTATGTAGACGGGATACACAATGTTGTGGATGTT**  
**TTAGAAGAGATTGAATTAGGAAAATTGAACGATTTAGACTTTTTTGAAGGGCTTGCATGTATCGGTG**  
**GGTGTATTGGTGGACCGTTGACTGTTGAAAATAATTTGTGGCCAAAATAGAATAAGAAAACCTGAC**  
**AGAAAAACTTCTAAAAAAGAAGAGGCTTTGTTTGTAGAGGAAGAGATTGATTTGAAGAGGTGAA**  
**ATGGAAAAAGAAAATAGAAAAAAGTGAAGTTATGAAGTTGGACAAAGACATTTCAAAAAGCGCTTGA**  
**AATGATGAAACAATAGACACTCAATACAAAGCCTTACCAGGACTTGACTGTGGTTCTTGTGGTTCTC**  
**CTACTTGACAGGGCATTGGCGGAAGATATAGTGAAGGGTATGCTACGGAATATGATTGCATTTTTAT**  
**ATTA AAAAGACAAAATAAAAAATTTGTCTCAAGAATTAATGACCTTGCGGGTAAAATTCCTCCAGTTT**  
**TAAGTGACGAAAAGGAGTGA**AATTT**ATGAGGATAAAAAGTAGAAGATCTTGTCAATAGCGGATTTAA**  
**ATTAATTGCAGGGGACAACGGAATCAGCAAAGAAATTGAGGGGGTGTATATATGCGACCTTTTAAAG**  
**TTGGGTTATGGCTCATGCAAAAAGCAAAAAGCGCTTGGATAACAATTCAAACTCATATAAATATTGTA**  
**GCAGTGGCTTTGCTGGCAGAAAATAAGTTGCATAATAATCCCGAAAATGCGAAATTAGATGAGGAA**

**861:**  
Ser/Thr  
protein kinase

**862:**  
TamHydS

**863:**  
DRTGG protein

GCCAAGAGGAAAGCCGATGAGGAGGGCATCCCTATATTAAGTTTTTCAGGAACCTCTTATGAAGCAG  
CAATAACTTTGTACGAGATGATGAAGTGAIGCTTTACTATGATTTGCACATTCATACAGCGCTATCTCC  
TTGTGCTTCTGATGATATGACTCCTAACCAATTGTCAATATGGCTTCTATAAAAAGGACTTGATGTAAT  
AGCTATAACAGATCATAACAGTGCAAAAAATGTAAAAGCTGTGTATAATCTTGGATTAAAAAAAGGC  
TTAATAGTAGTTCCTGGTATAGAGGTACAGACAAGAGAAGAGGTTACATACTTTGTTATTTTATTC  
AGTAGATGAATGTATAAAAATTTAGTGAAATTATTAACAAAAATTTGATAAAAATTAAAAAACAAAAA  
ACAATCTTTGGGAATCAATTTGTAATGAATGAAGAAGATAACATAGCAGAGGAAATAGATTACTCAT  
TGTTAGTTTCTTCTAATTTAAGTGTTAATGAAATTTTCGACTACATGGAGGGCAGGGGGGAGCGGTC  
CCTGCCCATGTGGATCGATATTCCTATAGTATTATATCAAAATCTTGGTTTTATTCCGAATTAAAAAAT  
TTAATTACAATCGAGGTATCGAAAGCCATCAGAAAAGAAAATTTTTACACTCATATCCCGAATATAA  
AAAAATAAAAATTATAAGTCTTCAGATGCTCATTATTTAGGAGATATTTCTGAAAAGAGAAGAATTTCT  
TACTGTGCGGGTCTGAATTAAAAAAGTATTGTAGACTGGCTAAGAGGTTATTGAATTTTTCTATAATCCT  
ACTAAATTAGTTGGACTTATTAGAAAATAAAAAATTTTTATAAAAAATTTGTTAAAGTTTTAATAAAGTTA  
TGATATAATATTGACAAAGAATGCACAAAAAATTTATATGAGATAAGCTATATGAAATTTTAATTCACAA  
GGAGGGAATAAATGGATGCTTTGTGCCAAAATTCGGTGAAGAGAAAAGTAGAGAGGTTTAAAAAG  
GCTTTGGAGGAATTAAAAAATATCCCTGGTTCGTTGATAGCAATTATGAATGAGGCTCAGGAAATTTT  
TGGATATCTTCTATTGAAGTTCAACTTTATATTTCAAAGAAATGAATGTGCCTTTAACAGAAATATT  
TGAATAGCTACTTTTTATTCAAGGTTACTTTAAAGCCTTCGGGTAATAACAAGATCAATTTGTGTAT  
GGGAACAGCTTGTATGTAAGAGGAGCTGCAATGGTACTGGAAAAATAAAAGAAAAATTGGGAAT  
AGAAGTAGGTGAAGCAACTGAAGACGGGAAATTTTCTTAGAACCTACTAGGTGTCTTGGAGCTTGC  
GGATTGGCTCCTGTTATGATGATAAATGGTGAAGTTTTTGAAGACTAACTCCTGATGATGTGGATG  
AAATATTAAGTAAATTTGAGTAAAGATTTGATTGTTATGAAGAATTAGCACTTTATATATTAGATTT  
GTCACAAAATAGCATAAGAGCGGGAGCTAAAAATTTTGTATTGAAATAAATATAGATACTTCAAAA  
GATATGCTTAAAGTGTCTATAGAAGATGATGGATGTGGAATGAAGGAGGAATTATAAAAAAGTCT  
ACAGACCTTTTGTAACTACAAGGAAGGAAAGAAAAGTAGGGCTTGGGATTCGCTCTTAAAGGAGC  
TTGTCCAGCAGTGTGAAGGGAATTTTGTAGATTTTTTCTGAAGAAGGAAAAGGAACAAAAATAATGG  
GTACTTTTAAACTTTCCAGTGTAGACCTTGTCCACTAGGAGATATAGCGTCAACAATTGTTTCGGTGA  
TATTATCTGCTCCAGAAGTGATATTGTATACAAATACAACAAAGATAACCATGAATTTTTGTTGAC  
ACTAAAGAACTTAAAAAATACTAAAGGGTGTCAATATAAATGACATCAAGGTGTTGAACTGGATA  
AAAGAATATATAAATGAGAATATGAAAGGTGATATGGAGGTGGAATAATGAAATCTATAGAGGAAT  
TGAAAAAATCAGAAAAGAAACATTAGAAAGAATCAATTTGAGAAAGGATAGGTCAGGTGTAAGAAT  
TGCTGTTGGTATGGCTACTTGCAGTATTGCAGCAGGAGCGAGACCTGTCATGATGGCGATATTGGATG  
AAGTACAGAGAAAATGTCACGGATGTAATTTGTTACAGAGACAGGGTGTATAGGTATGTGTAAATTA  
GAACCAATTGTAGATGTTTATGTTCCCGCCAAGAGAAAAGTACTTACGTAAAGGTTGATGAGAAAAA  
GGCAAGGCAATAGTTGCTGAACATGTTATAAATGGCCATCCAATCAGAGAATGGACTATTGAAAAT  
ACGAATAGAGGAGGGGAAATAGTATGCTTTATAGGTACACGTAATGGTATGTGGTGGTACCGGATG  
TACATCTTCAGATTCTGATAAAGTAGCAGAGCGTTTTACAGAGGAAATAAAAAAGGCTGGTCTAGAT  
AAAGAAGTATTAGTTGTAAGAACTGGATGCTTTGGCCTTTGCGAATTGGGACCAGTTGTTGTAGTGT  
ATCCTGAAGGAGTTTTTTATAGCAGAGTTAAACCTGACTATGTTCCGAAATTGTGGAAGAGCACCT  
GCTAAAAGGAAGACCTGTTAAGAAATATCTCTATGGAGAAAGCGTGACAGAAAAGAGAGATTAAGCC  
ATTGGAAGAGACTCCTTTCTTTAGAAAGCAAAAGAGAATTGCTCTTAGAAATTGTGGTATTATCAACC  
CTGAAGATATAAGAGAAGCAATTGCTTTTGTGGATATAGGGCTTTAGCAAAGGTTCTTACTCAAAT  
GACACAAAAGAGGTTATCGAAGAAGTCAAAAAATCTGGCTTAAGGGGTAGAGGCGGCGGTGGAT  
TCCCACAGGTGTGAAATGGGAATTTGCTTATAACCAAAAAGAACTCAAAGTATGTAGTTTGCAA  
CGCTGATGAAGGGGACCCTGGTCTTTTATGGATAGAAGCATATTAGAAGGAGACCCCCACAGTGT  
ATAGAGGCTATGGCAATAGCAGGATACGCAATTGGAGCAAATATGGCTACATCTACGTAAGGGCA  
GAGTATCCTTTGGCAGTAAAAAGGCTTAAGATTGCTATTGAACAGGCTAGAGAATATGGCCTTTAG  
GAAAAGACATATTTGGTACAGTTTTGATTTTGACATTGAAATAAGGTTAGGAGCAGGCGCTTTGT

Overlapping ORF: Stopp-codon A = start codon A

864: PHP protein domain

865: NADH-quinone oxidoreductase

866: Histidine kinase

868: NADH dehydrogenase

CTGTGGAGAAGAGACTGCGCTTTTAAATTCAGTAATGGGAAGAAGAGGCGAACCAAGGCCAAGACC  
ACCATTCCTGCTGTAAAGGGTGTATGGAGCAAACCTACAATTATTAATAACGTAGAGACATTCGCTA  
ATATTCCGCCAATTATACTAAATGGTGC GGAGTGGTTTTCAAGCATAGGTACTGAAAAATCGAAAGG  
AACAAAGTTTTTGCCCTGACCGGTAAGGTAAACAATACAGGTCTTATTGAAGTCCAATGGGGACC  
ACTTTAAGAGAAATTATATACGAAATAGGTGGAGGAATACCTAACGGAAAGAAATTTAAAGCTGCTC  
AAACTGGAGGACCTTCAGGTGGCTGCATTCTGCAGAGCATTTAGATACACCAATAGATTACGATTCC  
TTAATAAATGTAGGTTCTATGATGGGTT CAGGTGGACTTGTTGTAATGGATGAAGACACTTGTATGG  
TCAATGTTGCAAAATCTTCCTTGAGTTACAGTTGATGAGTCCTGCGGTAAATGTGCGCCTTGTAGG  
ATTGGCACAAAAAGAATGCTGGAGCTTTTAGAAAAGATAACTTCTGGTAAAGGTGAAGAAGGAGAC  
ATTGAAAAGTTGGAGGAACCTGCGAAAACCATTAAAGCGACAGCTTTGTGCGGCCTTGGACAAACA  
GCCCCAAATCCGGTTTTATCTACAATTAGATATTCAGAGATGAATATGAGGCGCATATAAAAGAGA  
AAAAATGCCAGCTGGCGTATGCCAAGCCCTCTTAAGATTTTATATTGACCCCGATAAGTGTAAAGGC  
TGTGGAATTTGTGCTAAAAATTGTCCTGTCAATGCTATTTCTGGAAAACCAAGGCAGCCTTATGTGAT  
TGACCAAGACAAATGTATAAAGTGC GGCACATGCATTGAAAAATGTCCATTTGGCGCAATCTACAAA  
AAATAATTGAAGGAAGGAGTGTAAAAGATGGACAAAGTTCGTGTTACGATAGATGGCATCACTGTG  
GAAGTTCCTCCCATTATACCGTATTGGAAGCAGCAAAAGAAGCAGGAATAGATATCCCCACACTGT  
GTTACTCAAGGAAATCAACCAAATTGGCGCTTGCCGTATATGTGTAGTTGAAATAGAGGGAGTTAG  
AAATTTACAAACCTCCTGCACTTATCCGGTATTTGATGGCATGAAAGTGATACAAATACAGCTAAAA  
TAAGAGAAGCGCGGAAATTAATCTTGAGCTTATACTTTCAAATCATGATAGAAGTTGTTTGACTTGT  
ATTAGAAATACTAACTGTGAGCTTCAATCATTGTCTAAAAAATTAGGAGTAAATGAAATAAGGTTTG  
AAGGGGAAAATATAAAGTATTCTATAGATAATGCTTCTCCTGCTATAGTTCGAGATCCAAATAAGTGT  
GTACTTTGTAGAAGATGTGTAGCAGTATGTT CAGAAGTGCAAAACGTATTTGCCATTGGAATGGTAA  
ATAGAGGATTTAAAACAATGGTAGCACCTTCTTTGGGAGAAGTTTAAAAGATTCCCCTTGATAAGT  
TGTGGACAGTGTATTGAGGTATGTCCTGTTGGAGCTATATATGAAAAAGACCATACAAAAAGAGTTT  
ATGAAGCTTTAGCTGATGAGAAAAAATATGTAGTAGCTCAAACAGCTCCAGCAGTAAGAGTAGCATT  
AGGTGAAGAGTTTGGTATGCCTATAGGAAGTATCGTTACTGGAAAAATGGTAGCAGCTTTGAAGAG  
GATGGGTTTTGACGCGGATTTGATACGGATTTTGC GGC GGACTTGACTATAATGGAAGAAGGCTCG  
GAACTTCTGAAAGGCTTAAAAATGGTGGAAAACCTCCTATGATAACTTCTGTAGTCTGGTTGGAT  
AGCTTTCTGTGAAAAATATTATCCAGAATTTATAGATAATCTTTCAACTTGTAAGTCTCCTCACATGAT  
GATGGGGGCATTAGTAAAGAGTTATTATGCAGAAAAGGAAGGGCTTAATCCTGAGGATATATATGT  
GGTATCAATTATGCCATGTA CTGCTAAAAAACTAGAGATTGAAAGACCAGAAATGCAGCATAATGGA  
ATAAAAGATGTAGATGCTGTCCTTACCACAAGAGAATTGGCGAGAATGATAAAAGAAATGGGCATC  
GACTTTGTAAATCTTCTGATGAAGAATATGATGAACCTCTTGGAAATGTCCACTGGCGCTGGAGTGAT  
ATTCGGAGCTACAGGTGGAGTTATGGAGGCAGCTTAAAGGACAGTTGCAGATATTGTAGAAGGAAG  
GGAATTAGACAAGGTTGACTTTGAAGAAGTGAGAGGCTTAGAAGGGGTAAGAGAAGCTACCATAA  
AAATAGATGGTATGGACATAAAAGTTGCCATAGCAAATGGTACAGGAAATGCTAAAAAACTTCTTGA  
CAAAATAAAGGCTGGTGAAGTTGAGTACCCTT CATAGAGGTAATGGGTTGCCAGGAGGATGCAT  
AATGGGAGGCGGTCAGCCGATTCACAATCCAAATGAAATGGGAAAAGTAAAAGAATTAAGAGCAA  
AAGCCATTTATGAAGCTGATAAAAGCTTACCATAAGAAAATCTCACAAAAATCCTGCAATACAAAA  
ACTTTATGAAGAATTTTTGGGAAGTCCTTTAAGTGAGAAGTCTCATCTTACTTCACACTCACTATTC  
CAAGAAGGAATTGTATCCTTTGGTGAGATAAGCTTAATCAAAGTAAAGCTTCCAATATATTATGGG  
AGCTTTACCATTTTTTATTTTTAAAGTTAGTTATAGAAATGTATATAATTTATGATATAATAAAAAAGAAT  
AGTAATTTATGATGCTATTAGA ACTTAAGGAGTGAAAGAAATTTGAGAAGAGGTAAGAGTCCATATACA  
TTGGTGTTTTTACTCATTGTGCGCCTAATTTTAGGAGAATTTAGGAGATCTGCTTGACATTTTTTTAA  
AGAATTAGCTTATTATCAAATAATAGGCATGGACAATCCACTTACTTTGAACTTGAGTTTTATTAGGTTT  
TCTTTTCAGTTATCTTAAAATAAATATAGGAACAGTTGTAGGATTAGTTCTTGCAATTTACGCTTATTA  
CAAATGTAGGTGATAAGATGAAAATTGCTTCTTAAATCGCCAAGGAGAAGAGAGTTACTTTCC  
AAATTTAGGACTTGACTTTGAAGTGGTAGAAAGTAATGTAAAAGAGTTTTCAAGAGAAAAGCAGCCT

869:  
Group A [FeFe]-  
hydrogenase

871: maf  
protein

TCAAGATATGTCATGGATTATCTTTAATAAAGCTATGTCGGTTGCTAAAAAATTAAGTGAAGAAGC  
TATAGTGATAGGTGCTGATACCGTTGTAGTAATTGGAGATAAAAATTTAGGAAAGCCAAAGGATAG  
AAATGAAGCTTATGTTATGCTTAAAAAGTTACAGGGAAAAGCTCATACAGTATATACAGGAATTACT  
ATCGTCAGAACTTACGATTTAAATATGTAAGCGATTTTAAAAGACAAAAGTTTGGATTAGAAAAT  
TACAAGATGAGGAAAATTTAATTATATCGATACTGGCGAAGTTTATGATAAAGCTGGGGCATATGC  
TATACAAGGAGTGGGTGCTTATTGTTGAGAAAATTGAAGGAGATTATTTAATGTGGTAGGTCTTC  
CAATTCAAAACTTTTGATATTTAAAAAGAGAGTTTGATGTGAGGTTACTTTGAAGGGTGAAGGG  
GTTGGCAAG



## Supporting References

1. B. Taboada, K. Estrada, R. Ciria and E. Merino, *Bioinformatics*, 2018, **34**, 4118-4120.
2. V. V. Solovyev, A. A. Salamov, I. A. Seledtsov, D. Vorobyev and A. G. Bachinsky, 2011.
3. S. T. Stripp, *Acs Catal*, 2021, **11**, 7845-7862.
4. M. Senger, S. Mebs, J. Duan, F. Wittkamp, U. P. Apfel, J. Heberle, M. Haumann and S. T. Stripp, *Proc Natl Acad Sci U S A*, 2016, **113**, 8454-8459.
5. M. Senger, T. Kernmayr, M. Lorenzi, H. J. Redman and G. Berggren, *Chem Commun (Camb)*, 2022, **58**, 7184-7187.
6. M. Senger, S. Mebs, J. Duan, O. Shulenina, K. Laun, L. Kertess, F. Wittkamp, U. P. Apfel, T. Happe, M. Winkler, M. Haumann and S. T. Stripp, *Phys Chem Chem Phys*, 2018, **20**, 3128-3140.
7. M. Senger, K. Laun, F. Wittkamp, J. Duan, M. Haumann, T. Happe, M. Winkler, U. P. Apfel and S. T. Stripp, *Angew Chem Int Ed Engl*, 2017, **56**, 16503-16506.
8. H. Land, A. Sekretareva, P. Huang, H. J. Redman, B. Nemeth, N. Polidori, L. S. Meszaros, M. Senger, S. T. Stripp and G. Berggren, *Chem Sci*, 2020, **11**, 12789-12801.
9. D. V. Rial and E. A. Ceccarelli, *Protein Expr Purif*, 2002, **25**, 503-507.
10. E. S. Morales, I. L. Parcerisa and E. A. Ceccarelli, *Protein Sci*, 2019, **28**, 800-807.
11. H. Li and T. B. Rauchfuss, *J Am Chem Soc*, 2002, **124**, 726-727.
12. A. Silakov, C. Kamp, E. Reijerse, T. Happe and W. Lubitz, *Biochemistry-U S*, 2009, **48**, 7780-7786.
13. S. Mebs, M. Senger, J. Duan, F. Wittkamp, U. P. Apfel, T. Happe, M. Winkler, S. T. Stripp and M. Haumann, *J Am Chem Soc*, 2017, **139**, 12157-12160.
14. C. Lorent, S. Katz, J. Duan, C. J. Kulka, G. Caserta, C. Teutloff, S. Yadav, U. P. Apfel, M. Winkler, T. Happe, M. Horch and I. Zebger, *J Am Chem Soc*, 2020, **142**, 5493-5497.
15. M. Senger, V. Eichmann, K. Laun, J. Duan, F. Wittkamp, G. Knor, U. P. Apfel, T. Happe, M. Winkler, J. Heberle and S. T. Stripp, *J Am Chem Soc*, 2019, **141**, 17394-17403.
